The impact of exercise intensity on neurophysiological indices of food-related inhibitory control  
and cognitive control: A randomized crossover event-related potential (ERP) study

Bruce W. Bailey<sup>1</sup>, Alexandra M. Muir<sup>2</sup>, Ciera L. Bartholomew<sup>1</sup>, William F. Christensen<sup>3</sup>, Kaylie  
A. Carbine<sup>4</sup>, Harrison Marsh<sup>1</sup>, Hunter LaCouture<sup>1</sup>, Chance McCutcheon<sup>1</sup> & Michael J. Larson<sup>2,5</sup>

<sup>1</sup>Department of Exercise Sciences, Brigham Young University

<sup>2</sup>Department of Psychology, Brigham Young University

<sup>3</sup>Department of Statistics, Brigham Young University

<sup>4</sup>Department of Psychology, California State University Dominguez Hills

<sup>5</sup>Neuroscience Center, Brigham Young University

Word Count: 9275

Tables: 5

Figures: 5 (Figures 3, 4, and 5 are color)

Corresponding Author: Bruce W. Bailey, PhD

267 SFH

Brigham Young University

Provo, UT 84606

[bailey.bruce@gmail.com](mailto:bailey.bruce@gmail.com)

1 Abstract

2 Food-related inhibitory control, the ability to withhold a dominant response towards highly  
3 palatable foods, influences dietary decisions. Food-related inhibitory control abilities may  
4 increase following a bout of aerobic exercise; however, the impact of exercise intensity on both  
5 food-related inhibitory control and broader cognitive control processes is currently unclear. We  
6 used a high-powered, within-subjects, crossover design to test how relative intensity of aerobic  
7 exercise influenced behavioral (response time, accuracy) and neural (N2 and P3 components of  
8 the scalp-recorded event-related potential [ERP]) measures of food-related inhibitory and  
9 cognitive control. Two hundred and thirteen participants completed three separate conditions  
10 separated by approximately one week in randomized order: two exercise conditions (35%  
11 [moderate] or 70% [vigorous] of  $VO_{2max}$ ) and seated rest. Directly following exercise or rest,  
12 participants completed a food-based go/no-go task and a flanker task while  
13 electroencephalogram data were recorded. Linear mixed models showed generally faster  
14 response times (RT) and improved accuracy following vigorous exercise compared to rest, but  
15 not moderate-intensity exercise; RTs and accuracy did not differ between moderate intensity  
16 exercise and rest conditions. N2 and P3 amplitudes were larger following vigorous exercise for  
17 the food-based go/no-go task compared to rest and moderate intensity exercise. There were no  
18 differences between exercise conditions for N2 amplitude during the flanker task; however, P3  
19 amplitude was more positive following vigorous compared to rest, but not moderate exercise.  
20 Gender did not moderate exercise outcomes. Results suggest improved and more efficient food-  
21 related recruitment of later inhibitory control and cognitive control processes following vigorous  
22 exercise.

23 *Keywords:* inhibitory control, cognitive control, exercise, event-related potential, ERP

26

## 1. Introduction

27 Cognitive control is the ability to allocate neural resources in order to adapt and interact  
28 with the surrounding environment and update behavior to achieve one's goals (Mackie et al.,  
29 2013; Miller and Cohen, 2001). Cognitive control encompasses a variety of component  
30 processes, including performance monitoring, inhibitory control, and attention/control allocation,  
31 all which involve interplay between the anterior cingulate and prefrontal cortices, among other  
32 areas (Botvinick et al., 2001; Miller and Cohen, 2001). Although cognitive control is essential  
33 for goal-directed behaviors, the factors that enhance or decrease cognitive control abilities are  
34 areas of continued research.

35 One factor that may impact an individual's cognitive control abilities is exercise, with  
36 recent literature demonstrating that exercise may have a small enhancing effect on cognitive  
37 control component processes (for example Chang et al., 2012; Guiney and Machado, 2013; Kao  
38 et al., 2019; Kempton et al., 2011; Ligeza et al., 2018; Ludyga et al., 2016). This general  
39 improvement in cognitive control abilities following exercise suggests that, in addition to  
40 improving overall physical and mental health (Knapen et al., 2015; LeBouthillier and  
41 Asmundson, 2017; Morres et al., 2019), exercise may also acutely improve our ability to  
42 accurately identify environmental demands to achieve goal-directed behavior.

43 Although there appears to be a small positive effect of exercise on general cognitive  
44 control abilities, not all results are in agreement (Lambourne and Tomporowski, 2010;  
45 Tomporowski and Ellis, 1986). This heterogeneity in findings may be partially due to the variety  
46 of exercise intensities employed in studies, as different intensities of exercise could have  
47 different effects on subsequent cognitive control (Olson et al., 2016; Wohlwend et al., 2017).  
48 Meta-analytic evidence shows that light-to-moderate intensity exercise has a small, but

49 beneficial, effect on cognitive control; however, this positive effect is only present immediately  
50 following the acute exercise (Chang et al., 2012). In comparison, moderate-to-vigorous exercise  
51 demonstrates the same small positive effect on cognitive control, but the effect lasts longer when  
52 compared to lighter intensity exercise (Chang et al., 2012; Moreau and Chou, 2019). Taken  
53 together, although exercise may have a small positive effect on cognitive control, the intensity at  
54 which exercise is performed may differentially affect subsequent cognitive control abilities and  
55 the length to which the effect extends.

56         One facet of cognitive control that may be particularly influenced by exercise intensity is  
57 inhibitory control. Inhibitory control is the ability to withhold a dominant response to override  
58 basic instincts or habits to produce goal directed behavior (Diamond, 2013; Ko and Miller,  
59 2013). A single bout of aerobic exercise acutely enhances inhibitory control abilities (Kamijo et  
60 al., 2007; Kao et al., 2017). This enhancement of inhibitory control abilities may be attributed to  
61 increased blood flow in the dorsolateral prefrontal cortex during or directly following exercise  
62 (Byun et al., 2014; Yanagisawa et al., 2010). There is also evidence that exercise may increase  
63 general oscillatory brain activity when compared to a resting state, causing an enhancement of  
64 multiple cognitive processes rather than inhibitory control abilities specifically (Ciria et al.,  
65 2018). Further research surrounding the role of exercise intensity in inhibitory control abilities is  
66 needed to parse apart what exact intensities of exercise may enhance inhibitory control (Carbine,  
67 In Press).

68         Event-related potentials (ERP) derived from electroencephalogram (EEG) data can be  
69 utilized to understand the neural bases of cognitive and inhibitory control, including how acute  
70 bouts of aerobic exercise affect these cognitive processes. One neural index of inhibitory control  
71 is the N2 component of the scalp-recorded ERP. The N2 is a negative-going ERP that peaks

72 approximately 200 to 350 milliseconds following the onset of a stimulus. N2 amplitude becomes  
73 more negative as additional inhibitory resources are recruited to withhold a dominant response  
74 towards a stimulus (Folstein and Van Petten, 2008; Larson et al., 2014). The cognitive process  
75 which the N2 indexes depends on the task and stimuli being utilized for the experiment at hand,  
76 with the N2 reflecting response inhibition during both a go/no-go (Folstein and Van Petten,  
77 2008) and flanker tasks (Van Veen and Carter, 2002; Xie et al., 2017). In addition to the N2, the  
78 P3 is a positive-going waveform that appears approximately 300 to 600 ms following the  
79 presentation of a stimuli, whether auditory or visual (Falkenstein et al., 1999). The P3 is larger  
80 when inhibiting a dominant motor response (Gajewski and Falkenstein, 2013) and when  
81 suppressing attention towards other nonrelevant stimuli in the environment (Polich, 2007). The  
82 functional significance of the P3 is still being debated, however, prominent theories posit that the  
83 P3 component is representative of context updating following stimuli or is representative of the  
84 allocation of attentional resources to salient stimuli (Polich, 2007).

85         The few studies that have examined the impact of exercise intensity on inhibitory control  
86 processes reflected by the N2 ERP component report mixed results. Larger (more negative) N2  
87 amplitudes were observed during exercise (at 40% and 60% of VO<sub>2</sub> peak) compared to a seated  
88 rest condition, suggesting greater cognitive control implementation during exercise (Olson et al.,  
89 2016). However, the effects of exercise on N2 amplitude may be different when measured  
90 directly following exercise with N2 amplitude decreasing following moderate exercise (60% of  
91 max heart rate) in both adults and children (Pontifex and Hillman, 2007; Stroth et al., 2009).  
92 Ligeza et al. (2018) observed differential effects of exercise intensity in a between-subjects  
93 design, with N2 amplitude becoming larger at submaximal aerobic intensity (between the first  
94 and second ventilatory thresholds) when compared to rest, but smaller after high intensity

95 interval training compared to rest (Ligeza et al., 2018). Taken together, these results suggest that  
96 exercise intensity may play a role in inhibitory control as indexed by N2 amplitude, although the  
97 direction of that relationship is currently unclear.

98         Although the findings surrounding the inhibitory control processes reflected by the N2  
99 and exercise are variable, the variability in quantifying and implementing intensity of exercise  
100 may at least partially explain the heterogeneity in results. Themanson et al. (2006) had  
101 participants exercise at 85% of their maximal heart rate, which is considered to be high intensity  
102 exercise. Pontifex and Hillman (2007) along with Stroth et al. (2009) used 60% of the  
103 individual's estimated maximum heart rate to define moderate exercise, while Ligeza et al.,  
104 (2018) used ventilatory thresholds. As Ligeza et al. explains, this wide variety in definitions for  
105 exercise intensity may cause each study to be examining different intensities of exercise per  
106 participant. As such, standardized methods of exercise intensity based on the physical fitness of  
107 the individual participant is essential to understand how exercise intensity affects cognition.

108         Similar to the N2, acute exercise seems to have mixed effects on cognitive control  
109 processes reflected by P3 amplitude. In the most exhaustive meta-analysis to date, Kao et al.  
110 (2020) concluded that P3 amplitude generally increases following an acute bout of continuous  
111 aerobic submaximal exercise when compared to rest. However, for some studies, P3 amplitude  
112 after aerobic exercise was moderated by the age of the participant (Brush et al., 2020; Kamijo  
113 and Takeda, 2009; Lennox et al., 2019), fitness level (Tsai et al., 2016; Tsai et al., 2014),  
114 emotional context of exercise (Miller et al., In Press), and baseline levels of inhibitory control  
115 abilities (Drollette et al., 2014), suggesting multiple moderating factors in the relationship  
116 between exercise and P3 amplitude (see also Chacko et al., 2020). Interestingly, across various  
117 studies included in the meta-analysis, larger P3 amplitude was observed when comparing

118 continuous aerobic exercise to high intensity interval training and rest, while decreased P3  
119 amplitude was observed between high intensity interval training and rest (Kao et al., 2017). As  
120 outlined by Kao et al. (2020), in general, it seems as if continuous aerobic exercise may be  
121 beneficial to inhibitory control processes (Hillman et al., 2003; Kamijo et al., 2007; O'Leary et  
122 al., 2011), but much like the N2, this relationship may be different depending on the intensity of  
123 exercise.

124 Moderation of dietary behavior is one specific example of the importance of inhibitory  
125 control. Despite widespread evidence that a healthy diet reduces the risk of obesity, Type 2  
126 diabetes, cardiovascular disease, high blood pressure, and depression to name a few (Carek et al.,  
127 2011; Cornelissen and Smart, 2013; Fiuza-Luces et al., 2018; Kirwan et al., 2017; Swift et al.,  
128 2018), the impulse to consume highly palatable and high-calorie foods is difficult to inhibit, even  
129 if an individual has recently eaten (Armelagos, 2014; Rogers and Brunstrom, 2016). This is  
130 complicated in the current environment where highly palatable, high calorie foods are plentiful  
131 and food related cues (food related pictures, ads and smells) are ubiquitous. As such, highly  
132 palatable and high-calorie foods require specific inhibitory control to reduce automatic urges to  
133 consume (Carbine et al., 2017; Guerrieri et al., 2007).

134 Individuals who are obese may display lower inhibitory control (Lavagnino et al., 2016;  
135 Spitoni et al., 2017), suggesting a decreased ability to withhold the dominant response to  
136 moderate caloric intake. In addition, lower inhibitory control is associated with overeating  
137 (Guerrieri et al., 2007), along with higher consumption of carbohydrates and more calories  
138 overall (Ko and Miller, 2013). Inhibitory control predicts saturated fat intake, rather than the  
139 consumption of fruits and vegetables, suggesting that inhibitory control is involved in the

140 withholding of dietary behavior rather than the initiation of eating healthy foods (Allom and  
141 Mullan, 2014).

142 As both the N2 and P3 ERP components can be used to index general inhibitory control,  
143 both of these event-related potentials can also be used to index food-related inhibitory control.  
144 The N2 is more negative as an individual inhibits a response to food stimuli when compared to  
145 non-food stimuli (Watson and Garvey, 2013) and more negative when inhibiting to high-calorie  
146 foods when compared to low-calorie foods (Carbine et al., 2017; Carbine et al., 2018b). These  
147 results suggest an increased need for inhibitory control neural resources when inhibiting a  
148 response towards high-calorie foods. Similar to the N2, P3 amplitude becomes larger (i.e., more  
149 positive) when inhibiting towards high-calorie foods compared to low-calorie foods (see also  
150 Aulbach et al., 2020; Carbine et al., 2017; Carbine et al., 2018a), again suggesting increased  
151 cognitive control when inhibiting to high-calorie foods.

152 As a number of studies have demonstrated a relationship between exercise intensity and  
153 inhibitory control, it is possible that exercise intensity also moderates the relationship between  
154 exercise and food-specific inhibitory control. Generally, researchers have hypothesized that  
155 physical activity may indirectly affect eating behavior through strengthening the neural circuits  
156 in the prefrontal cortex that influence inhibitory control, which in turn reduces impulses to  
157 consume high-calorie foods (Joseph et al., 2011). In one study, after a bout of aerobic exercise,  
158 inhibitory control increased (as indexed by accuracy and response time), and subsequently  
159 reduced consumption of high-calorie foods directly following the completion of the exercise  
160 condition (Lowe et al., 2016). In addition, several studies have observed reduced food intake  
161 acutely following exercise (Hagobian et al., 2013; Schubert et al., 2013; Sim et al., 2014).



162 However, a gap in the literature is research that has rigorously tested the neural mechanisms of  
163 food-related inhibitory control following different levels of exercise intensity.

### 164 *1.1 Aims and hypotheses*

165 Previous studies examining the relationship between exercise and inhibitory control have  
166 generally focused on how one intensity of exercise differs from rest, rather than examining how  
167 different intensities of exercise differentially effect cognitive control in the same sample of  
168 participants. Additionally, although there have been a number of studies that have examined the  
169 relationship between exercise and cognitive control, how this relationship extends to food-  
170 specific inhibitory control is less known. As such, the current study used a within-subjects  
171 crossover, design to evaluate the impact of moderate and vigorous exercise on both cognitive  
172 control and food-related inhibitory control. Given blood-flow based neuroimaging studies that  
173 suggest increased cerebral blood flow perfusion during mild-to-moderate intensity exercise, with  
174 a subsequent decrease toward resting values during vigorous exercise likely because of  
175 vasoconstriction during high intensity exercise (Joris et al., 2018; Ogoh and Ainslie, 2009), we  
176 hypothesized that there would be an inverted U-shaped relationship between both food specific  
177 inhibitory control and general inhibitory control. Specifically, we hypothesized that N2 and P3  
178 amplitude would increase for moderate intensity exercise but decrease for high intensity exercise  
179 when compared to seated rest for both the food-specific and general cognitive control tasks.

## 180 **2. Materials and Method**

181 All data for the current study are available on a study-specific Open Science Framework  
182 webpage: <https://osf.io/u9bdy/>.

### 183 *2.1 Participants*

184 All experimental procedures were approved by the Institutional Review Board at  
185 Brigham Young University and participants provided written informed consent. Exclusion  
186 criteria were determined by participant self-report and included being diagnosed with an eating  
187 disorder, psychiatric disorder, head injury resulting in loss of consciousness, a body mass index  
188 below 18.5, current pregnancy or lactation, or more than 225 minutes of cardiorespiratory  
189 exercise on average per week. Participants were between 18 and 45 years of age and self-  
190 endorsed the ability to exercise at a vigorous intensity (i.e., jog for 40 minutes). Prior to study  
191 enrollment, the Physical Activity Readiness Questionnaire (PAR-Q; (Arraiz et al., 1992) was  
192 used to screen the participant's ability to participate in physical activity. If any item was  
193 endorsed on the readiness questionnaire then the participant was not enrolled.

194 The sample size for the current study was calculated *a priori* (see Larson and Carbine,  
195 2017) based on a previous study examining the effects of exercise on attention to visual food  
196 cues in obese and normal weight women. In the Carbine et al. study, we observed a mean  
197 standard error of 2.77  $\mu\text{V}$  between exercise intensity conditions which was used in the current  
198 power analysis. With alpha set at .05 and beta at .80, we would need a sample of 200 participants  
199 to detect a mean difference as small as .43  $\mu\text{V}$ , which represents a 25% difference between the  
200 rest and 70% vigorous-intensity exercise conditions. Thus, we recruited 230 participants for the  
201 current study due to an *a priori* estimated 15% dropout rate.

202 Participant characteristics are described in Table 1. A total of 462 men and women were  
203 assessed for eligibility and 230 were randomized to exercise condition order (see Figure 1). Of  
204 the 230 participants that were randomized, 212 finished the study. Participants who did not  
205 complete the study cited loss of interest and lack of time to commit to the study as reasons for  
206 discontinuing participation. Those who did not finish the study did not differ from those who

207 finished the study on key demographic characteristics that included age ( $t(24.34) = -0.11$ ,  $p =$   
208  $0.91$ ), body mass index ( $t(20.24) = -1.71$ ,  $p = 0.10$ ), body fat ( $t(19.97) = -0.21$ ,  $p = 0.83$ ) or  
209  $VO_{2max}$  ( $t(18.78) = -0.42$ ,  $p = 0.68$ ). Heart rate and metabolic equivalent exercise intervention  
210 characteristics for the two exercise conditions are presented in Table 2.

## 211 *2.2 Procedures overview*

212 Each participant completed four lab visits, which included baseline testing in addition to  
213 three separate conditions conducted in randomized order: vigorous-intensity exercise (70% of  
214  $VO_{2max}$ ), moderate-intensity exercise (35% of  $VO_{2max}$ ), and seated rest. At the baseline session,  
215 participants were measured for height, weight, and body composition. They then completed a  
216 volitional fatigue  $VO_{2max}$  test that was used to prescribe the exercise interventions for the future  
217 35% and 70%  $VO_{2max}$  conditions. Baseline measurements took place at least two days prior to  
218 completion of subsequent study conditions.

219 The order of the three experimental sessions (70%  $VO_{2max}$ , 35%  $VO_{2max}$ , rest) were  
220 randomly assigned using a random number generator. Prior to arrival for each session,  
221 participants endorsed that they adhered to each of the following: slept for at least seven hours the  
222 night before, were adequately hydrated, did not consume any food or beverages with caloric  
223 content in the four hours preceding the session, and did not consume caffeine or perform  
224 vigorous exercise during the 24 hours preceding the session (see Carbine et al., 2017). Each of  
225 the three conditions were administered the same day of the week, at the same time of day, one  
226 week apart. If a participant could not attend on their scheduled day they were re-scheduled for  
227 the following week to maintain day of week and time of day consistency.

228 During the rest condition, instead of exercising participants were seated while they  
229 completed a battery of questionnaires that included the Dutch Eating Behavior Questionnaire, the

230 Yale Food Addiction Scale, and the Depression Anxiety Stress Scale. The data from these  
231 questionnaires were collected but are not reported in the current study as they were not part of  
232 the current hypotheses and are only included here for transparency/completeness of presentation.  
233 After completing the battery of questionnaires, the participants watched a 40-minute  
234 documentary titled “What Plants Talk About”  
235 (<https://www.youtube.com/watch?v=cIftMUWs4q0>) so they were in the lab a similar amount of  
236 time prior to the EEG recording as the exercise sessions, but in a resting situation watching a  
237 low-arousal video.

238 After the completion of the exercise or rest bout, participants were escorted up to the  
239 electroencephalogram research suite. The participant was given a towel to dry off while a fan  
240 blew to reduce sweat. Then, the participant was fit with an EEG cap, after which they completed  
241 a food-based go/no-go task and a flanker task (always in that order) during which EEG data were  
242 recorded. Upon completion of the computerized tasks, the EEG cap was removed and  
243 participants were either given a calendar reminder for their next session date or were  
244 compensated \$40 or provided course credit at the completion of the study.

### 245 *2.3 Measurements*

246 *2.3.1 Anthropometrics:* For descriptive purposes, height, weight and body composition  
247 were measured. Height was measured to the nearest 0.1 cm using a wall mounted stadiometer  
248 (SECA, Chino, California) and weight was measured to the nearest 0.1 kg (Tanita, Arlington  
249 Heights, IL). GE iDXA was used to describe body composition (GE, Fairfield, CT).

250 *2.3.2 VO<sub>2max</sub> Test:* VO<sub>2max</sub> was determined using a modified George protocol (George,  
251 1996). Safety guidelines outlined by the American College of Sports Medicine were followed to  
252 ensure participant safety (ACSM, 2018). Participants started the test with a 7-minute warm-up on

253 a treadmill walking at 3 mph with a grade that increased from 0-6%. Then the grade was lowered  
254 to 0% and participants chose a comfortable running speed at which to complete the rest of the  
255 test. Perceived exertion was measured using the Borg 6-20 scale after every minute of exercise  
256 and heart rate was measured continuously throughout the testing using a FT7 Polar heart rate  
257 monitor (NY, USA). After three minutes running at the selected pace, the grade increased by  
258 1.5% every minute. The test stopped when the participant self-reported voluntary exhaustion.  
259 The test was considered maximal if three of the five following criteria were met: the participant  
260 physically could not continue, their perceived exertion was either 19 or 20 on the Borg scale,  
261 their heart rate was within 15 beats per minute of their predicted maximum, their  $VO_2$  began to  
262 plateau, or their respiratory exchange ratio was  $\geq 1.0$ . Participants concluded the test with a four-  
263 minute walking cool-down. Measurements were taking using the COSMED Quark Ergo  
264 metabolic cart (Chicago, IL).

265 During the moderate-intensity and vigorous exercise sessions, participants jogged at a  
266 specified percentage (70% or 35%) of their  $VO_{2max}$  calculated at their baseline session. The  
267 intensity was prescribed directly based on the participant's measured maximal capacity. Within  
268 the first five minutes of the session, participants gradually increased exercise intensity until their  
269 specified percentage of  $VO_{2max}$  was achieved. They then maintained the intensity for the  
270 remainder of the exercise session (35 minutes). The exercise bout lasted for 40 minutes,  
271 including the buildup to the specified percentage of  $VO_{2max}$ . As such, all three pre-EEG activities  
272 (rest, moderate, and vigorous) lasted 40 minutes prior to EEG net application and completing the  
273 computerized tasks. If the participant needed to stop and take a break at any point during the  
274 exercise bout, the time was paused and continued after the participant began exercising again.

275 *2.4 Computerized tasks*

276            *2.4.1 High-calorie go/no-go tasks:* Participants were instructed to respond with a button  
277 press when they saw a low-calorie food (go-trial) and withhold all responses when a high-calorie  
278 food was presented (no-go trial). All stimuli were presented in a random order. Participants  
279 completed two blocks of 100 trials each, with 70 go trials and 30 no-go trials. This distribution of  
280 go/no-go trials was used to establish a predominance of go trials, making inhibitory behavior  
281 more challenging. Pictures of low and high-calorie foods were separated by a fixation cross  
282 jittered randomly from 600 to 700 milliseconds. Stimuli remained on the screen for 500 ms, and  
283 responses made after 1000 ms were considered omission errors and not used in data analyses.

284            Pictures used for the food stimuli were provided by Killgore and colleagues (2003) who have  
285 used these same images in papers published previously (e.g., Killgore et al., 2013; Killgore and  
286 Yurgelun-Todd, 2005, 2007). These images were first categorized by 26 separate undergraduates  
287 who rated all 120 pictures as either high- or low-calorie foods. Only stimuli that were accurately  
288 categorized as high- and low-calorie foods at least 95% of the time were used, resulting in 38  
289 pictures for each category (see Carbine et al., 2017). Low-calorie food stimuli included 13  
290 vegetables and 25 fruits. High-calorie food images consisted of 16 desserts, 15 high-calorie  
291 dinner meals, and 7 high-calorie breakfast meals. This task has been used previously and  
292 consistently elicits a more negative N2 and more positive P3 towards high-calorie foods (no-go  
293 trials) when compared to low-calorie foods (go trials; Carbine et al., 2017; Carbine et al., 2018a).

294            *2.4.2 Flanker task:* Upon completion of the go/no-go task, participants completed a  
295 modified arrow version of the Eriksen flanker task (Eriksen and Eriksen, 1974). Participants  
296 were instructed to respond as quickly and accurately as possible by pressing a button that  
297 corresponded to the directionality of the middle arrow. Congruent (e.g., <<<<) and  
298 incongruent (e.g., <<><) arrow groups in 36-point Arial white font were randomly presented

299 in the center of a black screen. To establish pre-potency, flanking arrows were presented for 100  
300 ms prior to the onset of the middle arrow, which remained on the screen for an additional 600  
301 ms. If a participant responded after 1,000 ms, the response was considered an error of omission  
302 and was not included in analyses. Between each trial, a fixation cross was shown for either 800  
303 ms, 1,000 ms, or 1,200 ms. These three fixation cross intervals were split evenly across the 204  
304 trials. Two blocks of 102 trials each were completed with 44% of trials being congruent and 56%  
305 of trials being incongruent.

### 306 *2.5 EEG data acquisition and reduction*

307 EEG data were collected and are reported according to the guidelines for studies using  
308 electroencephalography (Clayson et al., 2019; Keil et al., 2014). Specifically, all EEG data were  
309 collected from 128 equidistant passive Ag/AgCl electrodes in a hydrocel geodesic sensor net  
310 using an Electrical Geodesics, Inc. series 300 amplifier (20K nominal gain, band-pass = 0.01-100  
311 Hz). All data were referenced to the vertex electrode during data collection and were digitized  
312 continuously at 250 Hz with a 16-bit analog to digital converter. Electrode impedances were kept  
313 at or below 50 k $\Omega$  per the manufacture's recommendation. Offline, following data collection,  
314 data were digitally filtered with a 0.1 Hz high pass filter (0.3 rolloff; 36.9 db/octave) and 30 Hz  
315 low pass filter (0.3 rolloff; 19.5 db/octave) in NetStation (v5.3.0.1). Data were subsequently  
316 epoched from 200 ms before stimulus onset to 1000 ms following stimulus onset for both the  
317 flanker and the food-based go/no-go tasks. For the go/no-go task, trials were segmented to  
318 include only correct go and no-go trials. For the flanker task, trials were segmented to include  
319 only correct congruent and incongruent trials. Eye movements and blink artifacts were then  
320 corrected using independent components analysis (ICA) in the ERP PCA toolkit (Dien, 2010). If  
321 a component correlated with two blink templates (one from the ERP PCA toolkit and the other

322 derived by the authors) at a level of 0.9 or higher, that component was subsequently removed  
323 from the data. If any electrode had a fast average amplitude of over 50 microvolts or if the fast  
324 average amplitude was greater than 100 microvolts, the channel was defined as bad and replaced  
325 using the nearest six electrodes for interpolation (Dien, 2010).

326       Following artifact correction, data were average re-referenced and baseline adjusted from  
327 200 ms before stimulus onset using the ERP PCA toolkit (Dien, 2010). For the food-based  
328 go/no-go task, data were analyzed from a region of interest in the frontocentral area consisting of  
329 four a priori chosen electrodes (electrodes 6 [FCz], 7, 106, and 129 [Cz]; Carbine et al. (2017);  
330 Carbine et al. (2018a); see Larson, Farrer, & Clayson, (2011a) for electrode montage). Time  
331 windows were determined using a collapsed localizer approach over the region of interest  
332 wherein we visually examined the grand average waveforms collapsed across all conditions to  
333 determine the appropriate time window (Luck and Gaspelin, 2017). Mean amplitude for the N2  
334 was extracted from 200 to 300 ms following stimulus onset, while P3 mean amplitude was  
335 extracted from 400 to 550 ms following stimulus onset (see Carbine et al. (2017) and Carbine et  
336 al. (2018a) for similar time windows).

337       For the flanker task, N2 amplitude was analyzed from the same *a priori* chosen  
338 frontocentral region of interest (electrodes 6, 7, 106, and 129) and P3 amplitude was analyzed  
339 from a frontomedial region of interest consisting of four *a priori* selected electrodes (electrodes  
340 129, 31, 55, 80 (Larson et al., 2011a)). A collapsed localizer approach (collapsing across all  
341 conditions) over each region of interest was again used to select time windows. The N2  
342 amplitude was extracted using an adaptive mean amplitude of 16 ms from 270 ms to 380 ms  
343 following target arrow onset while the P3 amplitude was extracted using a mean amplitude from  
344 370 to 500 ms following target arrow onset. Mean amplitude was used along with region of



345 interests due to evidence suggesting that averaging multiple electrodes together increases signal  
346 reliability when compared to a single electrode (Clayson, 2020; Clayson et al., 2013).

### 347 *2.6 Reliability analysis*

348 To determine the minimum number of trials necessary to achieve adequate reliability for  
349 the N2 and P3 components, dependability estimates of ERPs were assessed through the ERP  
350 Reliability Analysis Toolbox v.0.3.2 (Clayson and Miller, 2017) using generalizability theory.  
351 To meet assumptions of independent colinearity, dependability estimates were calculated and are  
352 reported separately for each condition. Minimum dependability cut-offs were set at 0.5 (although  
353 overall dependability ranged from 0.64 to 0.96), and therefore, any participant that did not meet  
354 the dependability cut-off of 0.5 was taken out from further data analyses. For specific  
355 dependability estimates and minimum and maximum trial numbers by condition and ERP  
356 component, see Table 3.

357 For the go/no-go task, 36 sessions were removed for the N2 component (5.2% of all  
358 sessions, 13 [75% condition], 10 [35% condition], 13 [rest condition]) while 33 sessions were  
359 removed for the P3 component (4.8% of all sessions, 12 [70% condition], 9 [35% condition], 12  
360 [rest condition]). Fifty additional sessions were removed due to participant not completing a  
361 session or computer malfunction. Thus, the final sample size for the N2 was 200 sessions for  
362 70% exercise, 203 sessions for 35% exercise, and 201 sessions for rest. The final number of  
363 sessions for the P3 included 201 sessions for 70% exercise, 204 sessions for 35% exercise, and  
364 202 sessions for rest. Overall, dependability estimates for each condition were above 0.71 for the  
365 N2 and above .64 for the P3, suggesting adequate reliability for both ERP components.

366 For the N2 component derived from the flanker task 63 sessions were removed for not  
367 meeting the minimum 0.5 reliability threshold (9.1% of all sessions, 24 [70% condition], 15

368 [35% condition], 24 [rest condition]) while 61 sessions were removed for the P3 component  
369 (8.8% of all sessions, 33 [70% condition], 8 [35% condition], 20 [rest condition]). Additionally,  
370 51 sessions were excluded from data analyses due to the participant not completing a session or  
371 computer malfunction. Thus, for the N2, 189 70% exercise sessions, 198 35% exercise sessions,  
372 and 189 rest sessions were included in the final analyses. The P3 analyses included 181 70%  
373 exercise condition sessions, 205 35% condition sessions, and 193 rest condition sessions.

### 374 *2.7 Behavioral data*

375 Mean accuracy and median response time were extracted for both the food-based go/no-  
376 go task and the flanker task. Both mean accuracy and median response time (RT) were separated  
377 as a function of trial-type (go/no-go, congruent/incongruent) and exercise/rest condition. Mean  
378 accuracy and median RT separated by exercise condition are presented in Tables 4 and 5.

### 379 *2.8 Statistical analyses*

380 Means and standard errors are reported for all variables of interest in Tables 4 and 5.  
381 Alpha for statistical tests was set at 0.05. To determine how exercise intensity affected both  
382 behavioral measures (accuracy and RT) and neural measures (N2 amplitude and P3 amplitude)  
383 of inhibitory control, eight separate linear mixed models were fit in PC-SAS (v. 9.4). Condition  
384 (seated rest, 35% of  $VO_{2max}$ , and 70% of  $VO_{2max}$ ) and trial-type (go vs. no-go or congruent vs.  
385 incongruent) were the fixed effects and participant the random effect. The interaction between  
386 condition and trial-type was evaluated for all models, except the model evaluating go/no-go  
387 response time. This model only evaluated the main effect of condition since there was no  
388 response time associated with the no-go (withhold response) trials. The LSmeans procedure was  
389 used to evaluate significant main and interactive effects. The Tukey-Kramer adjustment was

390 made to p-values to compensate for multiple follow-up comparisons. All p-values that are  
391 reported have been adjusted accordingly.

392 To report effect size, Cohens  $f^2$  for multilevel models was estimated from the mixed  
393 models calculated in SAS using the process described by Selya et al. (2012). In addition,  
394 Cohen's  $d_z$  for within-subjects comparisons was calculated to report effect size for all follow-up  
395 comparisons calculated from the LSmeans procedure.

396 An exploratory analysis was performed to test for potential moderating effect of gender.  
397 To do this, the eight mixed models were repeated, but this time included gender as a fixed effect  
398 and the two-way interactions of gender and condition, and gender and trial-type were evaluated.  
399 These models also tested the three-way interaction between gender, trial-type and condition.

400 To aid with interpretability and visual comparisons, z-scores were calculated for each of  
401 the primary dependent variables of interest (accuracy, RT, N2 component amplitude, P3  
402 component amplitude) for both the go/no-go task and the flanker task. N2 amplitude and RT  
403 values were reverse scored as a more negative N2 is seen as larger and faster response time is  
404 seen as improved performance. These relationships as a function of exercise condition are  
405 displayed in Figure 2.

### 406 **3. Results**

#### 407 *3.1 Accuracy*

408 Overall, accuracy on the go/no-go task was high for all conditions and trials (see Table  
409 4). There was a significant main effect for condition (rest, 35% and 70%;  $F(2,420) = 4.56, p =$   
410  $.01, f^2 = 0.01$ ) and trial-type (go vs. no-go;  $F(1,636) = 776.08, p < .001, f^2 = 0.59$ ) but no  
411 significant interaction between condition and trial-type ( $F(2,636) = 0.30, p = .74, f^2 < 0.01$ ).  
412 Accuracy was better for the go trials compared to the no-go trials, as expected. Task accuracy

413 was better for the 70% condition compared to the rest condition ( $t(2,420) = -3.01, p < .01, d_z =$   
414  $0.15$ ), but the 70% condition was not different compared to the 35% condition ( $t(2,420) = -1.35,$   
415  $p = .37, d_z = 0.09$ ). There was also no difference between the 35% and rest conditions ( $t(2,420) =$   
416  $-1.66, p = .22, d_z = 0.07$ ).

417 For the flanker task, participants were more accurate on the congruent trials compared to  
418 the incongruent trials ( $F(1,636) = 626.52, p < .001, f^2 = 0.38$ ; see Table 5), as expected.  
419 However, there was no main effect for exercise condition ( $F(2,420) = 1.83, p = .16, f^2 < 0.01$ )  
420 along with no interaction for accuracy between condition and trial-type ( $F(2,636) = 1.13, p = .32,$   
421  $f^2 < 0.01$ ).

### 422 *3.2 Response times*

423 For the go/no-go task, correct go trial response time was different between the exercise  
424 conditions ( $F(2,420) = 6.52, p = .002, f^2 = 0.03$ ; see Table 4). Response times following the 70%  
425 condition were significantly faster than the rest condition ( $t(2,420) = 3.60, p < .001, d_z = 0.30$ )  
426 but were not different compared to the 35% condition ( $t(2,420) = 2.05, p = .10, d_z = 0.13$ ). There  
427 was also no difference in response time between the rest and 35% conditions ( $t(2,420) = 1.54, p$   
428  $= .27, d_z = 0.12$ ).

429 For the flanker task, there was a significant main effect of exercise condition ( $F(2,420) =$   
430  $7.47, p < .001, f^2 = 0.03$ ) and trial-type ( $F(1,635) = 6216.94, p < .001, f^2 = 3.27$ ), along with a  
431 significant condition by trial-type interaction ( $F(2,635) = 5.28, p < .01, f^2 = 0.02$ ). Response  
432 times were faster for the congruent compared to incongruent trials, as expected. Response times  
433 were faster for the 70% condition compared to both the rest ( $t(2,420) = 2.95, p = .009, d_z = 0.14$ )  
434 and 35% conditions ( $t(2,420) = 3.64, p = .001, d_z = 0.17$ ). There was no difference in response  
435 time between the rest and 35% conditions ( $t(2,420) = -0.70, p = 0.763, d_z < .01$ ). Faster response

436 times following the 70% condition compared to the other conditions were qualified by a  
437 significant condition by trial-type interaction, where the increase in response speed during the  
438 70% condition was observed primarily during the incongruent compared to the congruent trials  
439 for both the rest ( $t(1,635) = 4.15, p < 0.001, d_z = 0.29$ ) and 35% conditions ( $t(1,635) = 4.17, p <$   
440  $.001, d_z = 0.27$ ; see Table 5).

### 441 *3.3 Food related inhibitory control*

442 Figure 3 displays the N2 and P3 waveforms by exercise condition for the food-based  
443 go/no-go task. There was a significant main effect for both trial-type ( $F(1,610) = 164.81, p <$   
444  $.001, f^2 = 0.05$ ; see Table 4) and exercise condition ( $F(2,394) = 4.63, p = .01, f^2 = < 0.02$ ) for the  
445 N2 component, however, there was no significant condition by trial-type interaction ( $F(2,610) =$   
446  $0.09, p = .92, f^2 < 0.01$ ). The N2 amplitude was more negative (i.e., larger) for no-go trials than  
447 go trials, as expected. Follow-up analyses demonstrated that the N2 for the 70% condition was  
448 significantly more negative for both the go and the no-go trials compared to both the rest  
449 ( $t(2,394) = 2.46, p = 0.038, d_z = 0.17$ ) and 35% conditions ( $t(2,394) = 2.79, p = 0.015, d_z = 0.18$ ).  
450 There was no difference in N2 amplitude between the rest and 35% conditions ( $t(2, 394) = -0.31,$   
451  $p < 0.947, d_z = 0.02$ ).

452 Similar to the N2, the P3 ERP component also demonstrated a significant main effect for  
453 both trial-type ( $F(1,610) = 432.45, p < 0.001, f^2 = 0.29$ ) and exercise condition ( $F(2,394) = 4.84,$   
454  $p = 0.008, f^2 = 0.02$ ; see Table 4). There was also a significant interaction between trial-type and  
455 condition ( $F(2,610) = 3.56, p = 0.03, f^2 = 0.01$ ). The no-go trials displayed a significantly more  
456 positive (i.e., larger) P3 amplitude than the go trials, as expected. The P3 for the go trials was not  
457 different between the three conditions ( $p$ 's  $> 0.05$ ), however for the no-go trials the P3 was

458 significantly more positive after the 70% condition compared to both the rest ( $t(1, 610) = -3.52, p$   
459  $= 0.006, d_z = 0.22$ ) and 35% conditions ( $t(1, 610) = -3.53, p = 0.006, d_z = 0.24$ ).

### 460 3.4 Cognitive control

461 Figures 4 and 5 display the N2 and P3 waveforms by exercise conditions for the flanker  
462 task. For the N2 component during the flanker task, there was a main effect of trial-type  
463 (congruent vs. incongruent;  $F(1,593) = 279.71, p < .001, f^2 = 0.21$ ; see Table 4) but no main  
464 effect of exercise condition ( $F(2,377) = 0.09, p = .91, f^2 < 0.01$ ) nor an interaction between  
465 condition and trial-type ( $F(2,593) = 0.82, p = .44, f^2 < 0.01$ ). The N2 for the incongruent trials  
466 was more negative when compared to the congruent trials, as expected.

467 In contrast, for the P3 component there was a significant main effect for condition ( $F(2,$   
468  $377) = 3.60, p = 0.03, f^2 = 0.01$ ) and trial-type ( $F(1,593) = 199.10, p < 0.001, f^2 = 0.17$ ) but there  
469 was no interaction between condition and trial-type ( $F(2,593) = 0.30, p = 0.739, f^2 < 0.01$  ).  
470 Incongruent trials elicited a more positive P3 response when compared to congruent trials, as  
471 expected. The 70% condition was significantly more positive than the rest condition ( $t(2, 377) =$   
472  $-2.60, p = .03, d_z = 0.17$ ) but was not different than the 35% condition ( $t(2, 377) = -0.74, p = .74,$   
473  $d_z = 0.04$ ). There was no significant difference between the rest and 35% conditions ( $t(2, 377) = -$   
474  $1.90, p = .14, d_z = 0.14$ ).

### 475 3.5 Gender

476 Including gender in the previous models had no impact on the interpretation of any of  
477 exercise condition-related relationships. In other words, there were no gender-by-condition  
478 interactions for any of the exercise condition analyses and there were no three-way interactions  
479 between gender, condition and trial-type for any of the primary dependent variables of interest  
480 (RT, accuracy, N2, and P3 components). There was a significant difference between genders for

481 food go/no-go N2 ( $F(1, 606) = 5.39, p = .02$ ), and flanker P3 ( $F(1, 589) = 6.66, p = .01$ ),  
482 accuracy ( $F(1, 632) = 13.28, p < .001$ ), and response time ( $F(1, 631) = 13.69, p < 0.001$ ). Men  
483 had more negative go/no-go N2 amplitudes, more positive flanker P3 amplitudes, greater flanker  
484 accuracy and faster flanker response times.

485 There was also a significant gender-by-trial-type interaction for food go/no-go N2 ( $F(1,$   
486  $606) = 6.43, p = .01$ ), and flanker N2 ( $F(1, 589) = 20.11, p < .001$ ), P3 ( $F(1, 589) = 6.32, p =$   
487  $.01$ ), accuracy ( $F(1, 632) = 5.05, p = .02$ ), and response time ( $F(1, 631) = 37.63, p < .001$ ). The  
488 difference between go and no-go trial N2 amplitude was greater for men than women ( $0.22 \pm$   
489  $0.08 \mu\text{V}; t(2, 606) = 2.54, p = 0.011$ ). The difference between the incongruent and congruent  
490 trials was greater for men than women for both the N2 ( $0.61 \pm 0.14 \mu\text{V}; t(1, 589) = -4.48, p <$   
491  $0.001$ ) and P3 ( $0.49 \pm 0.19 \mu\text{V}; t(1, 589) = 2.51, p = .012$ ) ERP components. The difference in  
492 accuracy between the incongruent and congruent trials was greater in women than men ( $0.01 \pm$   
493  $0.006 \%$ ;  $t(1, 632) = 2.25, p = .025$ ). Similarly, the difference in response time between the  
494 incongruent and congruent trials was greater for women than men ( $9.52 \pm 1.55 \text{ ms}; t(1, 631) = -$   
495  $6.13, p < .001$ ).

#### 496 4. Discussion

497 We used a high-powered, within-subjects crossover design to test the role of exercise  
498 intensity on behavioral and neurophysiological measures of cognitive control (flanker task  
499 performance and ERP amplitudes) and food-related inhibitory control (go/no-go task  
500 performance and ERP amplitudes). The impact of exercise on cognitive control (as measured by  
501 the flanker task) was intensity dependent. Specifically, response times were faster following  
502 vigorous intensity exercise at 70% of max  $\text{VO}_{2\text{max}}$  compared to both rest and moderate intensity  
503 exercise at 35% of max  $\text{VO}_{2\text{max}}$  and P3 component amplitudes for congruent and incongruent

504 trials were more positive following vigorous intensity exercise compared to rest, but not  
505 moderate intensity exercise. Notably, response times were disproportionately faster with higher  
506 intensity exercise on incongruent compared to congruent trials, suggesting that cognitive control  
507 may be specifically more efficient following high intensity exercise. N2 component amplitudes  
508 during the flanker task and flanker accuracy did not differ as a function of exercise intensity,  
509 indicating that the effects may not be present in all aspects of cognitive control performance,  
510 although nuance is required in the interpretation of these findings.

511         The impact of exercise on cognitive control has been evaluated in a number of studies,  
512 the majority of which have shown enhanced P3 component amplitude following exercise (Kao et  
513 al., 2019) with relatively few studies reporting N2 component results. For example, current N2  
514 results that do not differ by exercise condition are consistent with Themanson et al. (2006) who  
515 also observed no change in N2 amplitude during a modified flanker task following exercise at a  
516 similar intensity as prescribed in our study (roughly 85% of heart rate max, or 169 beats per  
517 minute). Similarly, recent work by Chacko et al., (2020) suggests that vigorous-intensity aerobic  
518 exercise may be more related to selective attention, but not initial indexing of conflict or control-  
519 related functions—consistent with findings of enhanced P3 component amplitude, but no  
520 condition-related differences for N2 amplitude. However, current N2 results are in contrast to  
521 those observed by Ligeza et al. (2018) who observed a more negative N2 following exercise  
522 between the 1<sup>st</sup> and 2<sup>nd</sup> ventilatory thresholds, which turned out to be about 75% of heart rate  
523 max. They also observed a blunted (i.e., less negative) N2 following high intensity interval  
524 training.

525         Key differences in these studies may explain the seemingly divergent results. First, the  
526 exercise performed in our study was most similar to Themanson et al (2006) and in-between the



527 intensities performed in the Ligeza et al. (2018) study. Specifically, our moderate exercise (35%  
528  $\text{VO}_{2\text{max}}$ ) condition was less intense than the aerobic exercise prescribed in Ligeza et al. (2018),  
529 and our vigorous exercise condition (70%) was less intense than their high intensity interval  
530 training condition. In addition, each participant completed the flanker task after the food related  
531 go/no-go task, which may have influenced our results as the effects of exercise on brain activity  
532 may change with time (Ciria et al., 2018).

533         There are over 20 studies that have evaluated the impact of exercise on attentional  
534 allocation measured by P3, although it is challenging to bring the findings of these studies  
535 together given the variability in exercise duration and intensity, the timing of the neural  
536 measurement post-exercise, and the variety of different cognitive tasks performed (Kao et al.,  
537 2019; Ludyga et al., 2016). In addition, most of the studies had small sample sizes, which  
538 reduces statistical power and limits the ability to accurately identify small effects of exercise on  
539 cognitive control. The large sample and within-subjects design of the current research  
540 considerably increases the statistical power and confidence in current results, along with the  
541 consistent findings with the large majority of the cognitive control and P3 amplitude literature  
542 (Kao et al., 2019).

543         Specifically, studies evaluating exercise completed in the light- to low-moderate intensity  
544 range (similar to light walking) seem to agree with our finding that there is no impact on P3  
545 amplitude (Kamijo et al., 2004; Kamijo and Takeda, 2009). However, studies that exercise  
546 participants at an intensity that is similar to 60 to 75% of heart rate max generally demonstrate  
547 that the P3 ERP component is elevated compared to controls (Chang et al., 2017; Kamijo et al.,  
548 2004; Kamijo et al., 2007; Kao et al., 2017; O'Leary et al., 2011; Pontifex et al., 2015; Scudder et  
549 al., 2012). The effect of exercise seems to weaken as intensity of exercise increases, with mixed

550 results for studies exceeding 75% of heart rate max (Chu et al., 2015; Hillman et al., 2003;  
551 Kamijo et al., 2007; Ligeza et al., 2018). Very high intensity exercise of greater than 90% seems  
552 to either have no impact on the P3 ERP component or a decreased P3 amplitude suggesting that  
553 the inverted U we initially hypothesized may be present at higher intensities of exercise than was  
554 conducted in the current research (Kamijo et al., 2004; Kao et al., 2017; Ligeza et al., 2018).  
555 Thus, current results are a step in understanding the role of exercise intensity levels on cognitive  
556 control functions, but future studies testing higher intensity levels are needed to more fully test  
557 an inverted-U hypothesis.

558         A critical component of cognitive control is response inhibition, which involves  
559 overcoming or suppression of an action that is inappropriate in a given context. For the current  
560 study we were interested in the response to high- and low-calorie foods tested using a food-  
561 specific go/no-go task. A clear pattern of improved performance and increased ERP amplitudes  
562 was present for vigorous exercise (70% of  $VO_{2max}$ ) compared to rest. Specifically, there was  
563 improved accuracy, faster response times, and larger N2 and P3 amplitudes for vigorous  
564 exercise. Notably, these were all main effects with the exception of P3 component amplitude that  
565 showed an interaction and was specific to no-go, but not go trials. These results suggest that the  
566 impact of exercise on food-specific response inhibition may be a more general facilitative affect  
567 and that this facilitative effect is intensity dependent. Both the N2 and P3 were larger in the  
568 vigorous exercise condition compared to the moderate (35% of  $VO_{2max}$ ) exercise condition and  
569 the seated rest condition. Response time and accuracy were both better for the vigorous exercise  
570 condition compared to the rest condition.

571         Notably, there were no differences between the moderate intensity exercise and rest  
572 conditions. The absence of condition-related differences between the moderate intensity exercise

573 and rest conditions is a consistent finding for both the food-specific go/no-go and flanker tasks—  
574 indicating that higher intensity exercise appears necessary to modulate inhibitory and cognitive  
575 control measures. More specifically, although 35% of  $VO_{2max}$  is classified as moderately intense  
576 exercise (3-6 METs), these results suggest that 35% of  $VO_{2max}$  is insufficiently intense to have a  
577 meaningful impact on subsequent neural activity during the go/no-go task. The 70% condition is  
578 a vigorously intense activity level (> 6 METS) and while we anticipated a suppression of neural  
579 activity at this intensity, the results of the study suggest that if there is a U-shaped relationship,  
580 70% of  $VO_{2max}$  is still in the range where neural activity is elevated.

581 In general, the findings from the go/no-go food-specific inhibitory control task largely  
582 parallel the changes in general cognitive control as observed from the flanker task. Two main  
583 exceptions to this that may point to a food specific effect of exercise on response inhibition.  
584 First, there was a significant main effect of condition on the N2 component during the go/no-go  
585 task, but no main effect of condition during the flanker task. Second, there was a trial-type-by-  
586 condition interaction for the P3 ERP component during the go/no-go task, but this same  
587 interaction was not observed during the flanker task. During the go/no-go task a more positive P3  
588 result was observed specifically in the 70% condition for no-go high-calorie pictures, suggesting  
589 increased recruitment of later neural resources to increase inhibitory control specifically towards  
590 high-calorie foods. This elevated P3 component during no-go trials following vigorous exercise  
591 suggests that more neural resources were recruited to inhibit the dominant response for high-  
592 calorie foods.

593 There are only a handful of studies that have evaluated the impact of exercise on various  
594 event-related potentials to visual food cues. These studies have primarily used passive viewing  
595 tasks in contrast to cognitive control tasks (such as a go/no-go task). For example, Hanlon et al.,

596 (2012) showed a reduced late posterior positivity (LPP) amplitude to pictures of plated foods  
597 compared to pictures of flowers in women (both healthy weight and those with obesity) after an  
598 acute 45-minute bout of high moderate-intensity exercise compared to rest, suggesting reduced  
599 motivation towards food following exercise. In contrast, participants in Carbine et al. (In Press)  
600 performed exercise at moderate (3.7 METS) and vigorous (7.4 METS) intensities and found no  
601 difference in the centro-parietal P3 or LPP ERP components following either exercise condition  
602 or rest. Given that these two studies were conducted using passive viewing attention-based  
603 paradigms, instead of cognitive control or response inhibition paradigms, it is difficult to make  
604 clear comparisons.

605         There are some studies in adolescents looking at exercise and neural responses to food  
606 cues. Two separate studies of adolescents showed decreased P3 amplitudes to food stimuli  
607 compared to nonfood stimuli following acute moderate-intensity exercise compared to rest  
608 (Fearnbach et al., 2016; Fearnbach et al., 2017). However, the decreased amplitudes were  
609 moderated by obesity status, since the P3 component amplitude to food stimuli was decreased  
610 after exercise only in adolescents with obesity. In another crossover study in adolescents there  
611 was no difference in N2 amplitude to a go/no-go task between 60 minutes of seated video game  
612 play vs. active video game play (Smith et al., 2020). Taken together, all these studies suggest that  
613 there might be a positive role of exercise on reducing attentional allocation towards food cues,  
614 however the results are not homogeneous and may be more impactful in adults or be moderated  
615 by obesity. Our study adds to this research, suggesting that not only does exercise have the  
616 potential to influence neural reflections on food cues but also is able to enhance response  
617 inhibition to high-calorie foods. Additionally, our study adds evidence that primarily vigorous

618 exercise (70%  $VO_{2max}$ ), rather than moderate exercise (35%  $VO_{2max}$ ), may be beneficial in  
619 increasing cognitive control and food-specific inhibitory control functions.

620 As an exploratory portion of this study, we tested the possible moderating role of gender.  
621 The gender-related analyses were done primarily to inform future research and to ensure that  
622 there were not gender-specific effects given recent findings suggesting that P3 component  
623 amplitude to a flanker task may be more positive in female than male exercisers, but not different  
624 between genders in more sedentary individuals (Lennox et al., 2019). Notably, we did not have  
625 gender-related hypotheses going into the current study. In contrast to the Lennox et al. findings,  
626 gender did not interact with exercise intensity for any of the dependent variables in the current  
627 study. Despite the absence of interactions with exercise intensity, there were some gender  
628 differences that are worth noting even though they did not alter the results of this study. Men in  
629 the study tended to have a more negative N2 response for the go/no-go task and a more positive  
630 P3 response to the flanker task. They also tended to respond faster and with better accuracy than  
631 the women. Our findings of increased amplitude N2 and P3 component amplitudes in men  
632 compared to women are consistent with previous work showing larger N2 and error-related ERP  
633 component amplitudes in men compared to women as well as decreased accuracy and longer  
634 response times in female participants (Clayson et al., 2011; Larson et al., 2011b; Stoet, 2010),  
635 suggesting these gender and cognitive control differences are likely not specific to exercise.

#### 636 *4.1 Potential mechanisms*

637 Although there have been a number of proposed mechanisms explaining the impact of  
638 exercise on response inhibition and cognitive control, the mechanisms underlying these changes  
639 remain unclear and evidence is still limited. One possible mechanism is neurotransmitter changes  
640 associated with exercise—specifically catecholamines that are associated with cognitive

641 response following higher intensity exercise (e.g., exercise beyond moderate walking)(Joris et  
642 al., 2018; Ogoh and Ainslie, 2009). The possibility of catecholamine-related changes is also  
643 interesting since catecholamines are involved in altering eating behavior (Wellman, 2000). The  
644 concentration of catecholamines in the brain raises with increased exercise intensity but  
645 appreciable levels of norepinephrine are not generally observed until around 50% of  $VO_{2max}$   
646 (Joris et al., 2018; Ogoh and Ainslie, 2009). This would potentially explain the increase in ERP  
647 amplitudes, accuracy and response times in the vigorous intensity condition compared to both the  
648 moderate and rest conditions. It is also possible that elevated levels of serum brain derived  
649 neurotrophic factor (BDNF) can modulate the relationship between exercise intensity and  
650 cognitive performance, particularly since BDNF increases at moderate to high levels of physical  
651 activity (Hung et al., 2018; Jimenez-Maldonado et al., 2018).

652 Another possible moderator of the relationship between exercise intensity and cognitive  
653 and inhibitory control functions is changes in cerebral blood flow following exercise (Smith and  
654 Ainslie, 2017). Specifically, there is a transient change in cerebral blood flow that is intensity  
655 dependent. As exercise becomes more intense, cerebral blood flow tends to increase up to an  
656 exercise intensity of  $\sim 60\%$   $VO_{2max}$  after which blood flow plateaus and begins to decrease  
657 toward resting values as exercise intensity continues to increase, likely due to vasoconstriction  
658 (Joris et al., 2018; Ogoh and Ainslie, 2009; Smith and Ainslie, 2017). As noted above, it may be  
659 that the current  $\sim 70\%$   $VO_{2max}$  is not sufficiently vigorous to see a downturn in performance.  
660 Future research is needed to address this possibility.

661 There are other neuroelectric mechanisms specific to ERPs and human electrophysiology  
662 that may explain some variance in the relationship between exercise intensity and  
663 cognitive/inhibitory control abilities. Specifically, Polich (2007) suggested that increased P3

664 amplitude was the neural response stemming from memory processing coming from inhibiting  
665 task-irrelevant brain activation. This inhibition may be influenced by exercise-related changes in  
666 arousal regulated by the reticular activating system (Kinomura et al., 1996; McMorris et al.,  
667 2018), although recent findings suggest that the locus coeruleus may not be specifically  
668 implicated (McGowan et al., 2019). Others suggest that an increase in P3 amplitude may be due  
669 to a general arousal effect associated with exercise-related activity that heightens neuroelectric  
670 activity (Magnie et al., 2000). In short, although the precise mechanisms remain nonspecific,  
671 current findings likely result from an interaction of neurotransmitter, hemodynamic, and  
672 neuroelectric increases that may be associated with the general arousal following high intensity  
673 exercise.

#### 674 *4.2 Study limitations and strengths*

675 Study limitations should be considered when interpreting the current results. First, the  
676 testing order for the food go/no-go and the flanker was not randomized. The study was  
677 specifically designed for the food go/no-go paradigm to be completed first since food-related  
678 inhibitory control was the primary research question and the general cognitive control question  
679 was secondary. Not controlling for task order in the design means we cannot rule-out the  
680 possibility that the flanker results were influenced by the food-specific go/no-go task.  
681 Differences in findings between the tasks may be related to the timing of presentations, since the  
682 flanker was always performed after the go/no-go task. In addition, while the gender differences  
683 were interesting, the sampling for the study was not done randomly. Thus, the interpretation of  
684 differences between genders should be considered with caution.

685 Despite the limitations, this study is unique and has several strengths. First, this study is  
686 one of the first to evaluate the impact of acute exercise across multiple intensities on food-related

687 response inhibition. In addition, the large sample size makes the estimates of effect size more  
688 stable and reduces the possibility of inflated effects or missing a small effect. In addition, the  
689 study included both genders in roughly equal number, which allowed for some inferences on the  
690 role of gender on these relationships. Previous investigations lacked the sample size and gender  
691 diversity to explore this question. While not perfectly designed (as go/no-go and flanker task  
692 order was not randomized) the study also attempted to evaluate if any changes in food-related  
693 neural inhibition were a result of general cognitive control changes. The study also is unique in  
694 that it evaluates two different exercise intensities that are commonly performed at a duration that  
695 is more consistent with weight management recommendations. The apparent differences in the  
696 neural and behavioral response between exercise intensities suggests that evaluating different  
697 exercise intensities is important because the results of the study change based on the exercise  
698 prescription. Finally, the exercise prescription was precisely prescribed base on individually-  
699 measured maximal aerobic capacity, which is different for each individual.

## 700 **5 Conclusions and future directions**

701 Overall, this study supports previous studies that a single bout of exercise has the  
702 potential to influence measures of food-related inhibitory control and cognitive control. Results  
703 suggest that these benefits extend primarily to higher (i.e., jogging) but not lower intensity  
704 exercise (i.e., light walking). Benefits to inhibitory control are important for daily tasks such as  
705 withholding a prepotent response (like eating an apple instead of a donut when both are  
706 available) particularly during nonroutine circumstances (Banich, 2009). Thus, higher intensity  
707 aerobic exercise seems to be an efficient means of increasing inhibitory and cognitive control  
708 functions for a period of time after exercise (Kao et al., 2019). Future research is needed to  
709 determine specific neural mechanisms, assess if there is an inverted-U at maximal intensity



710 thresholds, test the role of adiposity/obesity, and to evaluate how food-specific inhibitory control  
711 and cognitive control are altered with exercise training over time and individual aerobic fitness.

## 712 **Disclosures**

713 There are no disclosures or conflicts of interest to report in regards to this paper.

## 714 **Acknowledgements**

715 The current study required a large team effort. We acknowledge and thank the following for their  
716 contributions to the project: Whitney D. Allen, Erin M. Corbin, Emma Hedges, Hanel Watkins,  
717 Jase Hoskin, Mika Honda, Emma Gleave, Michael Christensen, Landon Deru, Rebekah E.  
718 Rodeback, Tanner Ward, Landon Johnson, Joseph Hicks, Ryland Savage, Matt Starr, Andrew  
719 Stevens, Caleb Summerhays, Timothy Swingle, Kekoa Wu, James Whitlock, Hiilei Ellis, and  
720 Mitch Rands.

721 **Funding:** Funding for this study was provided by a university mentoring environment grant and  
722 a grant from the College of Family, Home, and Social Sciences obtained from an anonymous  
723 donor. The funding sources had no input in the study design.

## 724 **Author Contributions**

725 Bruce Bailey: conceptualization, methodology, formal analysis, resources, data curation, writing  
726 – original draft, visualization, supervision, project administration, funding acquisition. Alexandra  
727 M. Muir: data acquisition, visualization, formal data analysis, writing the original manuscript  
728 draft, writing – original draft, writing - review & editing, data curation. Ciera Bartholomew: data  
729 acquisition, visualization, formal data analysis, writing – original draft, writing - review &  
730 editing. William F. Christensen: formal data analysis, writing - review & editing. Kaylie A.  
731 Carbine: supervision, data curation, writing - review & editing. Harrison Marsh: supervision,  
732 project administration, writing - review & editing. Hunter LaCouture: supervision, project

733 administration, writing - review & editing. Chance McCutcheon: data curation, writing - review  
734 & editing. Michael J. Larson: conceptualization, funding acquisition, formal data analysis,  
735 methodology, resources, visualization, writing – original draft, writing - review & editing.

Table 1: Mean and standard deviation of height, weight and VO<sub>2max</sub> (n = 217)

|                                                                |              | Mean          | SD           | Range                |
|----------------------------------------------------------------|--------------|---------------|--------------|----------------------|
| <b>Age (years)</b>                                             | <b>Total</b> | <b>22.46</b>  | <b>3.68</b>  | <b>18, 44</b>        |
|                                                                | Men          | 23.14         | 3.65         | 18, 44               |
|                                                                | Women        | 21.78         | 3.58         | 18, 39               |
| <b>Height (cm)</b>                                             | <b>Total</b> | <b>171.73</b> | <b>9.46</b>  | <b>148, 195</b>      |
|                                                                | Men          | 178.31        | 6.77         | 161.9, 195           |
|                                                                | Women        | 164.77        | 6.43         | 148, 179.50          |
| <b>Weight (kg)</b>                                             | <b>Total</b> | <b>69.22</b>  | <b>14.07</b> | <b>45.30, 129.30</b> |
|                                                                | Men          | 76.15         | 13.73        | 57.10, 129.30        |
|                                                                | Women        | 61.89         | 10.22        | 45.30, 93.35         |
| <b>VO<sub>2max</sub> (ml kg<sup>-1</sup> min<sup>-1</sup>)</b> | <b>Total</b> | <b>44.05</b>  | <b>7.80</b>  | <b>28.21, 67.87</b>  |
|                                                                | Men          | 48.36         | 7.42         | 28.21, 67.87         |
|                                                                | Women        | 39.50         | 5.17         | 28.4, 52.95          |
| <b>BMI (kg m<sup>-2</sup>)</b>                                 | <b>Total</b> | <b>23.29</b>  | <b>3.24</b>  | <b>17.60, 36.90</b>  |
|                                                                | Men          | 23.80         | 3.44         | 17.60, 36.90         |
|                                                                | Women        | 22.74         | 2.93         | 18.00, 33.50         |
| <b>Max Heart Rate</b>                                          | <b>Total</b> | <b>195</b>    | <b>9.01</b>  | <b>169, 225</b>      |
|                                                                | Men          | 193           | 9.28         | 169, 225             |
|                                                                | Women        | 196           | 8.60         | 175, 214             |
| <b>Body fat (%)</b>                                            | <b>Total</b> | <b>25.97</b>  | <b>8.40</b>  | <b>9.69, 48.74</b>   |
|                                                                | Men          | 20.73         | 6.92         | 17.37, 48.85         |
|                                                                | Women        | 31.51         | 5.91         | 9.70, 45.18          |

SD = standard deviation.

Table 2: Heart rate and metabolic equivalent characteristics of exercise by condition

|                     | 35%   |      | 70%   |      |
|---------------------|-------|------|-------|------|
|                     | Mean  | SD   | Mean  | SD   |
| Average Heart Rate  |       |      |       |      |
| Male                | 107.9 | 12.2 | 162.2 | 11.4 |
| Female              | 110.2 | 12.9 | 163.2 | 11.4 |
| % of Max Heart Rate |       |      |       |      |
| Male                | 56.7% | 5.6% | 82.9% | 5.0% |
| Female              | 55.1% | 5.9% | 83.9% | 5.7% |
| METs                |       |      |       |      |
| Male                | 55.1  | 5.4  | 82.9  | 4.7  |
| Female              | 56.9  | 5.9  | 84.4  | 4.8  |

MET = Metabolic equivalent; 1 MET = resting metabolism

< 3 METs = light intensity activity, 3 to 6 METs = moderate intensity exercise,

> 6 METs = vigorous intensity exercise. SD = standard deviation.

Table 3: Dependability estimates and trial ranges for all ERP components

|             | Rest     |             | 35%      |             | 70%      |             |
|-------------|----------|-------------|----------|-------------|----------|-------------|
|             | Estimate | Trial Range | Estimate | Trial Range | Estimate | Trial Range |
| Flanker N2  |          |             |          |             |          |             |
| Congruent   | 0.83     | 49, 120     | 0.77     | 34,120      | 0.73     | 38,120      |
| Incongruent | 0.72     | 38,114      | 0.71     | 41, 113     | 0.78     | 31, 113     |
| Flanker P3  |          |             |          |             |          |             |
| Congruent   | 0.84     | 29, 120     | 0.82     | 28, 120     | 0.64     | 59, 120     |
| Incongruent | 0.84     | 22, 114     | 0.82     | 22, 113     | 0.84     | 46, 113     |
| GNG N2      |          |             |          |             |          |             |
| Go          | 0.96     | 12, 140     | 0.96     | 16, 140     | 0.95     | 14, 140     |
| No-go       | 0.88     | 8, 59       | 0.93     | 5, 58       | 0.90     | 8, 60       |
| GNG P3      |          |             |          |             |          |             |
| Go          | 0.94     | 12, 140     | 0.92     | 31, 140     | 0.92     | 13, 140     |
| No-go       | 0.91     | 5, 59       | 0.89     | 8, 58       | 0.90     | 8, 60       |

Table 4: Behavioral and ERP means and standard errors for the food-related go/no-go task by condition

|                              | Rest  |      | 35%   |      | 70%   |      | F    | p      |
|------------------------------|-------|------|-------|------|-------|------|------|--------|
|                              | Mean  | SE   | Mean  | SE   | Mean  | SE   |      |        |
| Response Time (ms)           |       |      |       |      |       |      | 6.52 | 0.002* |
| Go                           | 4.35  | 2.83 | 5.82  | 2.83 | 10.17 | 2.83 |      |        |
| Response Accuracy (%)        |       |      |       |      |       |      | 1.13 | 0.32   |
| Go                           | 97.42 | 0.52 | 98.23 | 0.52 | 98.64 | 0.52 |      |        |
| No-go                        | 87.78 | 0.52 | 88.64 | 0.52 | 89.58 | 0.52 |      |        |
| N2 Mean Amplitude ( $\mu$ V) |       |      |       |      |       |      | 0.09 | 0.92   |
| Go                           | -1.46 | 0.15 | -1.39 | 0.15 | -1.79 | 0.15 |      |        |
| No-go                        | -1.98 | 0.15 | -1.95 | 0.15 | -2.35 | 0.15 |      |        |
| P3 Mean Amplitude ( $\mu$ V) |       |      |       |      |       |      | 3.56 | 0.03*  |
| Go                           | 1.19  | 0.14 | 1.21  | 0.14 | 1.34  | 0.14 |      |        |
| No-go                        | 2.40  | 0.14 | 2.40  | 0.14 | 2.90  | 0.14 |      |        |

Note: Values presented for F and p refer to the exercise condition-by-trial type interaction except for the response time, where it is just the main effect of condition

\*p < .05, SE = standard error

Table 5: Behavioral and ERP means and standard errors for the flanker task by condition

|                              | Rest   |      | 35%    |      | 70%    |      | F    | p      |
|------------------------------|--------|------|--------|------|--------|------|------|--------|
|                              | Mean   | SE   | Mean   | SE   | Mean   | SE   |      |        |
| Response Time (ms)           |        |      |        |      |        |      | 5.28 | 0.005* |
| Congruent                    | 353.40 | 2.31 | 355.75 | 2.32 | 351.59 | 2.32 |      |        |
| Incongruent                  | 419.11 | 2.31 | 419.11 | 2.32 | 411.03 | 2.32 |      |        |
| Response Accuracy (%)        |        |      |        |      |        |      | 1.13 | 0.33   |
| Congruent                    | 96.04  | 0.52 | 95.02  | 0.53 | 94.78  | 0.53 |      |        |
| Incongruent                  | 88.71  | 0.52 | 87.92  | 0.53 | 88.42  | 0.53 |      |        |
| N2 Mean Amplitude ( $\mu$ V) |        |      |        |      |        |      | 0.82 | 0.44   |
| Congruent                    | 1.27   | 0.14 | 1.38   | 0.13 | 1.41   | 0.14 |      |        |
| Incongruent                  | 0.24   | 0.14 | 0.16   | 0.13 | 0.20   | 0.14 |      |        |
| P3 Mean Amplitude ( $\mu$ V) |        |      |        |      |        |      | 0.30 | 0.74   |
| Congruent                    | 2.70   | 0.16 | 3.00   | 0.16 | 3.02   | 0.17 |      |        |
| Incongruent                  | 4.05   | 0.16 | 4.30   | 0.16 | 4.49   | 0.17 |      |        |

Note: Values presented for F and p refer to the exercise condition by trial-type interaction

\*p < .05, SE = standard error

## Figure Legend

Figure 1 Overview of participant recruitment and analyses.

Figure 2 Z-score values of dependent variables for both tasks by exercise condition.

Figure 3 Event-related potential waveforms along with topographical maps for the N2 and P3 on the go/no-go trials. (COLOR)

Figure 4 Event-related potential waveforms along with topographical maps for the N2 on the incongruent trials during the flanker task. (COLOR)

Figure 5 Event-related potential waveforms along with topographical maps for the P3 on the incongruent trials during the flanker task. (COLOR)



## References

- ACSM, 2018. ACSM's Guidelines for Exercise Testing and Prescription: 10th Edition. Baltimore, Maryland. Lippincott Williams & Wilkins.
- Allom, V., Mullan, B., 2014. Individual differences in executive function predict distinct eating behaviours. *Appetite* 80, 123-130. <https://doi.org/10.1016/j.appet.2014.05.007>
- Armélagos, G.J., 2014. Brain evolution, the determinates of food choice, and the omnivore's dilemma. *Crit Rev Food Sci Nutr* 54, 1330-1341. <https://doi.org/10.1080/10408398.2011.635817>
- Arraiz, G.A., Wigle, D.T., Mao, Y., 1992. Risk assessment of physical activity and physical fitness in the Canada Health Survey mortality follow-up study. *J Clin Epidemiol* 45, 419-428. [https://doi.org/10.1016/0895-4356\(92\)90043-m](https://doi.org/10.1016/0895-4356(92)90043-m)
- Aulbach, M.B., Harjunen, V.J., Spapé, M., Knittle, K., Haukkala, A., Ravaja, N., 2020. No evidence of calorie-related modulation of N2 in food-related Go/No-Go training: A preregistered ERP study. *Psychophysiology* 57, e13518. <https://doi.org/10.1111/psyp.13518>
- Banich, M.T., 2009. Executive function: the search for an integrated account. *Curr. Dir. Psychol. Sci.* 18, 89-94. <https://doi.org/10.1111/j.1467-8721.2009.01615.x>
- Botvinick, M.M., Braver, T.S., Barch, D.M., Carter, C.S., Cohen, J.D., 2001. Conflict monitoring and cognitive control. *Psychol. Rev.* 108, 624-652. <https://doi.org/10.1037/0033-295x.108.3.624>
- Brush, C.J., Bocchine, A.J., Olson, R.L., Ude, A.A., Dhillon, S.K., Alderman, B.L., 2020. Does aerobic fitness moderate age-related cognitive slowing? Evidence from the P3 and lateralized readiness potentials. *Int. J. Psychophysiol.* 155, 63-71. <http://doi.org/10.1016/j.ijpsycho.2020.05.007>
- Byun, K., Hyodo, K., Suwabe, K., Ochi, G., Sakairi, Y., Kato, M., Dan, I., Soya, H., 2014. Positive effect of acute mild exercise on executive function via arousal-related prefrontal activations: an fNIRS study. *NeuroImage* 98, 336-345. <https://doi.org/10.1016/j.neuroimage.2014.04.067>
- Carbine, K.A., Anderson, J., Larson, M. J., LeCheminant, J. D., Bailey, B., In Press. The relationship between exercise intensity and neurophysiological responses to food stimuli in women: a randomized crossover event-related potential (ERP) study. *Int. J. Psychophysiol.* <https://doi.org/10.31219/osf.io/k26md>
- Carbine, K.A., Christensen, E., LeCheminant, J.D., Bailey, B.W., Tucker, L.A., Larson, M.J., 2017. Testing food-related inhibitory control to high- and low-calorie food stimuli: Electrophysiological responses to high-calorie food stimuli predict calorie and carbohydrate intake. *Psychophysiology* 54, 982-997. <https://doi.org/10.1111/psyp.12860>
- Carbine, K.A., Duraccio, K.M., Kirwan, C.B., Muncy, N.M., LeCheminant, J.D., Larson, M.J., 2018a. A direct comparison between ERP and fMRI measurements of food-related inhibitory control: Implications for BMI status and dietary intake. *NeuroImage* 166, 335-348. <https://doi.org/10.1016/j.neuroimage.2017.11.008>
- Carbine, K.A., Rodeback, R., Modersitzki, E., Miner, M., LeCheminant, J.D., Larson, M.J., 2018b. The utility of event-related potentials (ERPs) in understanding food-related cognition: A systematic review and recommendations. *Appetite* 128, 58-78. <https://doi.org/10.1016/j.appet.2018.05.135>

- Carek, P.J., Laibstain, S.E., Carek, S.M., 2011. Exercise for the treatment of depression and anxiety. *Int. J. Psychiatry Med.* 41, 15-28. <https://doi.org/10.2190/PM.41.1.c>
- Chacko, S.C., Quinzi, F., De Fano, A., Bianco, V., Mussini, E., Berchicci, M., Perri, R.L., Di Russo, F., 2020. A single bout of vigorous-intensity aerobic exercise affects reactive, but not proactive cognitive brain functions. *Int. J. Psychophysiol.* 147, 233-243. <http://doi.org/10.1016/j.ijpsycho.2019.12.003>
- Chang, Y.K., Chu, I.H., Liu, J.H., Wu, C.H., Chu, C.H., Yang, K.T., Chen, A.G., 2017. Exercise modality is differentially associated with neurocognition in older adults. *Neural Plast.* <https://doi.org/10.1155/2017/3480413>
- Chang, Y.K., Labban, J.D., Gapin, J.I., Etnier, J.L., 2012. The effects of acute exercise on cognitive performance: a meta-analysis. *Brain research* 1453, 87-101. <https://doi.org/10.1016/j.brainres.2012.02.068>
- Chu, C.-H., Alderman, B.L., Wei, G.-X., Chang, Y.-K., 2015. Effects of acute aerobic exercise on motor response inhibition: An ERP study using the stop-signal task. *J Sport Health Sci* 4, 73-81. <https://doi.org/10.1016/j.jshs.2014.12.002>
- Ciria, L.F., Perakakis, P., Luque-Casado, A., Sanabria, D., 2018. Physical exercise increases overall brain oscillatory activity but does not influence inhibitory control in young adults. *NeuroImage* 181, 203-210. <https://doi.org/10.1016/j.neuroimage.2018.07.009>
- Clayson, P.E., 2020. Moderators of the internal consistency of error-related negativity scores: A meta-analysis of internal consistency estimates. *Psychophysiology* 57, e13583. <http://doi.org/10.1111/psyp.13583>
- Clayson, P.E., Baldwin, S.A., Larson, M.J., 2013. How does noise affect amplitude and latency measurement of event-related potentials (ERPs)? A methodological critique and simulation study. *Psychophysiology* 50, 174-186. <https://doi.org/10.1111/psyp.12001>
- Clayson, P.E., Carbine, K.A., Baldwin, S.A., Larson, M.J., 2019. Methodological reporting behavior, sample sizes, and statistical power in studies of event-related potentials: Barriers to reproducibility and replicability. *Psychophysiology* 56, e13437. <http://doi.org/10.1111/psyp.13437>
- Clayson, P.E., Clawson, A., Larson, M.J., 2011. Sex differences in electrophysiological indices of conflict monitoring. *Biol Psychol* 87, 282-289. <http://doi.org/10.1016/j.biopsycho.2011.03.011>
- Clayson, P.E., Miller, G.A., 2017. ERP Reliability Analysis (ERA) Toolbox: An open-source toolbox for analyzing the reliability of event-related brain potentials. *Int. J. Psychophysiol.* 111, 68-79. <https://doi.org/10.1016/j.ijpsycho.2016.10.012>
- Cornelissen, V.A., Smart, N.A., 2013. Exercise training for blood pressure: a systematic review and meta-analysis. *J Am Heart Assoc* 2, e004473. <https://doi.org/10.1161/jaha.112.004473>
- Diamond, A., 2013. Executive functions. *Annu Rev Psychol* 64, 135-168. <https://doi.org/10.1146/annurev-psych-113011-143750>
- Dien, J., 2010. The ERP PCA Toolkit: an open source program for advanced statistical analysis of event-related potential data. *Journal of neuroscience methods* 187, 138-145. <https://doi.org/10.1016/j.jneumeth.2009.12.009>
- Drollette, E.S., Scudder, M.R., Raine, L.B., Moore, R.D., Saliba, B.J., Pontifex, M.B., Hillman, C.H., 2014. Acute exercise facilitates brain function and cognition in children who need it most: An ERP study of individual differences in inhibitory control capacity. *Dev Cogn Neuros-Neth* 7, 53-64. <https://doi.org/10.1016/j.dcn.2013.11.001>

- Eriksen, B.A., Eriksen, C.W., 1974. Effects of noise letters upon the identification of a target letter in a nonsearch task. *Perception & Psychophysics* 16, 143-149. [http://wexler.free.fr/library/files/eriksen%20\(1974\)%20effects%20of%20noise%20letters%20upon%20the%20identification%20of%20a%20target%20letter%20in%20a%20nonsearch%20task.pdf](http://wexler.free.fr/library/files/eriksen%20(1974)%20effects%20of%20noise%20letters%20upon%20the%20identification%20of%20a%20target%20letter%20in%20a%20nonsearch%20task.pdf)
- Falkenstein, M., Hoormann, J., Hohnsbein, J., 1999. ERP components in Go/Nogo tasks and their relation to inhibition. *Acta Psychol (Amst)* 101, 267-291. [https://doi.org/10.1016/s0001-6918\(99\)00008-6](https://doi.org/10.1016/s0001-6918(99)00008-6)
- Fearnbach, S.N., Silvert, L., Keller, K.L., Genin, P.M., Morio, B., Pereira, B., Duclos, M., Boirie, Y., Thivel, D., 2016. Reduced neural response to food cues following exercise is accompanied by decreased energy intake in obese adolescents. *Int. J. Obes.* 40, 77-83. <https://doi.org/10.1038/ijo.2015.215>
- Fearnbach, S.N., Silvert, L., Pereira, B., Boirie, Y., Duclos, M., Keller, K.L., Thivel, D., 2017. Reduced neural responses to food cues might contribute to the anorexigenic effect of acute exercise observed in obese but not lean adolescents. *Nutr Res* 44, 76-84. <https://doi.org/10.1016/j.nutres.2017.06.006>
- Fiuza-Luces, C., Santos-Lozano, A., Joyner, M., Carrera-Bastos, P., Picazo, O., Zugaza, J.L., Izquierdo, M., Ruilope, L.M., Lucia, A., 2018. Exercise benefits in cardiovascular disease: beyond attenuation of traditional risk factors. *Nat. Rev. Cardiol.* 15, 731-743. <https://doi.org/10.1038/s41569-018-0065-1>
- Folstein, J.R., Van Petten, C., 2008. Influence of cognitive control and mismatch on the N2 component of the ERP: a review. *Psychophysiology* 45, 152-170. <https://doi.org/10.1111/j.1469-8986.2007.00602.x>
- Gajewski, P.D., Falkenstein, M., 2013. Effects of task complexity on ERP components in Go/Nogo tasks. *Int. J. Psychophysiol.* 87, 273-278. <https://doi.org/10.1016/j.ijpsycho.2012.08.007>
- George, J.D., 1996. Alternative approach to maximal exercise testing and VO<sub>2</sub> max prediction in college students. *Res Q Exerc Sport* 67, 452-457. <https://doi.org/10.1080/02701367.1996.10607977>
- Guerrieri, R., Nederkoorn, C., Jansen, A., 2007. How impulsiveness and variety influence food intake in a sample of healthy women. *Appetite* 48, 119-122. <https://doi.org/10.1016/j.appet.2006.06.004>
- Guiney, H., Machado, L., 2013. Benefits of regular aerobic exercise for executive functioning in healthy populations. *Psychon B Rev* 20, 73-86. <https://doi.org/10.3758/s13423-012-0345-4>
- Hagobian, T.A., Yamashiro, M., Hinkel-Lipsker, J., Stredler, K., Evero, N., Hackney, T., 2013. Effects of acute exercise on appetite hormones and ad libitum energy intake in men and women. *Appl. Physiol. Nutr. Metab.* 38, 66-72. <https://doi.org/10.1139/apnm-2012-0104>
- Hanlon, B., Larson, M.J., Bailey, B.W., LeCheminant, J.D., 2012. Neural response to pictures of food after exercise in normal-weight and obese women. *Med Sci Sports Exerc* 44, 1864-1870. <https://doi.org/10.1249/MSS.0b013e31825cade5>
- Hillman, C.H., Snook, E.M., Jerome, G.J., 2003. Acute cardiovascular exercise and executive control function. *Int. J. Psychophysiol.* 48, 307-314. [https://doi.org/10.1016/S0167-8760\(03\)00080-1](https://doi.org/10.1016/S0167-8760(03)00080-1)

- Hung, C.L., Tseng, J.W., Chao, H.H., Hung, T.M., Wang, H.S., 2018. Effect of Acute Exercise Mode on Serum Brain-Derived Neurotrophic Factor (BDNF) and Task Switching Performance. *J Clin Med* 7. <https://doi.org/10.3390/jcm7100301>
- Jimenez-Maldonado, A., Renteria, I., Garcia-Suarez, P.C., Moncada-Jimenez, J., Freire-Royes, L.F., 2018. The Impact of High-Intensity Interval Training on Brain Derived Neurotrophic Factor in Brain: A Mini-Review. *Front. Neurosci.* 12. <https://doi.org/10.3389/fnins.2018.00839>
- Joris, P.J., Mensink, R.P., Adam, T.C., Liu, T.T., 2018. Cerebral Blood Flow Measurements in Adults: A Review on the Effects of Dietary Factors and Exercise. *Nutrients* 10. <https://doi.org/10.3390/nu10050530>
- Joseph, R.J., Alonso-Alonso, M., Bond, D.S., Pascual-Leone, A., Blackburn, G.L., 2011. The neurocognitive connection between physical activity and eating behaviour. *Obes Rev* 12, 800-812. <https://doi.org/10.1111/j.1467-789X.2011.00893.x>
- Kamijo, K., Nishihira, Y., Hatta, A., Kaneda, T., Kida, T., Higashiura, T., Kuroiwa, K., 2004. Changes in arousal level by differential exercise intensity. *Clin Neurophysiol* 115, 2693-2698. <https://doi.org/10.1016/j.clinph.2004.06.016>
- Kamijo, K., Nishihira, Y., Higashiura, T., Kuroiwa, K., 2007. The interactive effect of exercise intensity and task difficulty on human cognitive processing. *Int. J. Psychophysiol.* 65, 114-121. <https://doi.org/10.1016/j.ijpsycho.2007.04.001>
- Kamijo, K., Takeda, Y., 2009. General physical activity levels influence positive and negative priming effects in young adults. *Clin Neurophysiol* 120, 511-519. <https://doi.org/10.1016/j.clinph.2008.11.022>
- Kao, S.C., Cadenas-Sanchez, C., Shigeta, T.T., Walk, A.M., Chang, Y.K., Pontifex, M.B., Hillman, C.H., 2019. A systematic review of physical activity and cardiorespiratory fitness on P3b. *Psychophysiology*, e13425. <https://doi.org/10.1111/psyp.13425>
- Kao, S.C., Cadenas-Sanchez, C., Shigeta, T.T., Walk, A.M., Chang, Y.K., Pontifex, M.B., Hillman, C.H., 2020. A systematic review of physical activity and cardiorespiratory fitness on P3b. *Psychophysiology* 57, e13425. <https://doi.org/10.1111/psyp.13425>
- Kao, S.C., Westfall, D.R., Soneson, J., Gurd, B., Hillman, C.H., 2017. Comparison of the acute effects of high-intensity interval training and continuous aerobic walking on inhibitory control. *Psychophysiology* 54, 1335-1345. <https://doi.org/10.1111/psyp.12889>
- Keil, A., Debener, S., Gratton, G., Junghofer, M., Kappenman, E.S., Luck, S.J., Luu, P., Miller, G.A., Yee, C.M., 2014. Committee report: Publication guidelines and recommendations for studies using electroencephalography and magnetoencephalography. *Psychophysiology* 51, 1-21. <http://doi.org/10.1111/psyp.12147>
- Kempton, M.J., Ettinger, U., Foster, R., Williams, S.C., Calvert, G.A., Hampshire, A., Zelaya, F.O., O'Gorman, R.L., McMorris, T., Owen, A.M., Smith, M.S., 2011. Dehydration affects brain structure and function in healthy adolescents. *Hum. Brain Mapp.* 32, 71-79. <https://doi.org/10.1002/hbm.20999>
- Killgore, W.D., Kipman, M., Schwab, Z.J., Tkachenko, O., Preer, L., Gogel, H., Bark, J.S., Mundy, E.A., Olson, E.A., Weber, M., 2013. Physical exercise and brain responses to images of high-calorie food. *Neuroreport* 24, 962-967. <https://doi.org/10.1097/WNR.0000000000000029>
- Killgore, W.D., Young, A.D., Femia, L.A., Bogorodzki, P., Rogowska, J., Yurgelun-Todd, D.A., 2003. Cortical and limbic activation during viewing of high- versus low-calorie foods. *NeuroImage* 19, 1381-1394. [https://doi.org/10.1016/s1053-8119\(03\)00191-5](https://doi.org/10.1016/s1053-8119(03)00191-5)

- Killgore, W.D., Yurgelun-Todd, D.A., 2005. Body mass predicts orbitofrontal activity during visual presentations of high-calorie foods. *Neuroreport* 16, 859-863. <https://doi.org/10.1097/00001756-200505310-00016>
- Killgore, W.D., Yurgelun-Todd, D.A., 2007. Positive affect modulates activity in the visual cortex to images of high calorie foods. *Int J Neurosci* 117, 643-653. <https://doi.org/10.1080/00207450600773848>
- Kinomura, S., Larsson, J., Gulyas, B., Roland, P.E., 1996. Activation by attention of the human reticular formation and thalamic intralaminar nuclei. *Science* 271, 512-515. <https://doi.org/10.1126/science.271.5248.512>
- Kirwan, J.P., Sacks, J., Nieuwoudt, S., 2017. The essential role of exercise in the management of type 2 diabetes. *Cleve. Clin. J. Med.* 84, S15-s21. <https://doi.org/10.3949/ccjm.84.s1.03>
- Knapen, J., Vancampfort, D., Moriën, Y., Marchal, Y., 2015. Exercise therapy improves both mental and physical health in patients with major depression. *Disabil. Rehabil.* 37, 1490-1495. <https://doi.org/10.3109/09638288.2014.972579>
- Ko, Y.T., Miller, J., 2013. Signal-related contributions to stopping-interference effects in selective response inhibition. *Exp Brain Res* 228, 205-212. <https://doi.org/10.1007/s00221-013-3552-y>
- Lambourne, K., Tomporowski, P., 2010. The effect of exercise-induced arousal on cognitive task performance: a meta-regression analysis. *Brain research* 1341, 12-24. <https://doi.org/10.1016/j.brainres.2010.03.091>
- Larson, M.J., Carbine, K.A., 2017. Sample size calculations in human electrophysiology (EEG and ERP) studies: A systematic review and recommendations for increased rigor. *Int. J. Psychophysiol.* 111, 33-41. <http://doi.org/10.1016/j.ijpsycho.2016.06.015>
- Larson, M.J., Clayson, P.E., Clawson, A., 2014. Making sense of all the conflict: a theoretical review and critique of conflict-related ERPs. *Int. J. Psychophysiol.* 93, 283-297. <http://doi.org/10.1016/j.ijpsycho.2014.06.007>
- Larson, M.J., Farrer, T.J., Clayson, P.E., 2011a. Cognitive control in mild traumatic brain injury: conflict monitoring and conflict adaptation. *Int. J. Psychophysiol.* 82, 69-78. <https://doi.org/10.1016/j.ijpsycho.2011.02.018>
- Larson, M.J., South, M., Clayson, P.E., 2011b. Sex differences in error-related performance monitoring. *Neuroreport* 22, 44-48. <http://doi.org/10.1097/WNR.0b013e3283427403>
- Lavagnino, L., Arnone, D., Cao, B., Soares, J.C., Selvaraj, S., 2016. Inhibitory control in obesity and binge eating disorder: A systematic review and meta-analysis of neurocognitive and neuroimaging studies. *Neurosci Biobehav Rev* 68, 714-726. <https://doi.org/10.1016/j.neubiorev.2016.06.041>
- LeBouthillier, D.M., Asmundson, G.J.G., 2017. The efficacy of aerobic exercise and resistance training as transdiagnostic interventions for anxiety-related disorders and constructs: A randomized controlled trial. *J. Anxiety Disord.* 52, 43-52. <https://doi.org/10.1016/j.janxdis.2017.09.005>
- Lennox, K., Miller, R.K., Martin, F.H., 2019. Habitual exercise affects inhibitory processing in young and middle age men and women. *Int. J. Psychophysiol.* 146, 73-84. <http://doi.org/10.1016/j.ijpsycho.2019.08.014>
- Ligeza, T.S., Maciejczyk, M., Kalamala, P., Szygula, Z., Wyczesany, M., 2018. Moderate-intensity exercise boosts the N2 neural inhibition marker: A randomized and counterbalanced ERP study with precisely controlled exercise intensity. *Biol Psychol* 135, 170-179. <https://doi.org/10.1016/j.biopsycho.2018.04.003>

- Lowe, C.J., Kolev, D., Hall, P.A., 2016. An exploration of exercise-induced cognitive enhancement and transfer effects to dietary self-control. *Brain Cogn* 110, 102-111. <https://doi.org/10.1016/j.bandc.2016.04.008>
- Luck, S.J., Gaspelin, N., 2017. How to get statistically significant effects in any ERP experiment (and why you shouldn't). *Psychophysiology* 54, 146-157. <https://doi.org/10.1111/psyp.12639>
- Ludyga, S., Gerber, M., Brand, S., Holsboer-Trachsler, E., Puhse, U., 2016. Acute effects of moderate aerobic exercise on specific aspects of executive function in different age and fitness groups: A meta-analysis. *Psychophysiology* 53, 1611-1626. <https://doi.org/10.1111/psyp.12736>
- Mackie, M.A., Van Dam, N.T., Fan, J., 2013. Cognitive control and attentional functions. *Brain Cogn* 82, 301-312. <https://doi.org/10.1016/j.bandc.2013.05.004>
- Magnie, M.N., Bermon, S., Martin, F., Madany-Lounis, M., Suisse, G., Muhammad, W., Dolisi, C., 2000. P300, N400, aerobic fitness, and maximal aerobic exercise. *Psychophysiology* 37, 369-377. <https://doi.org/10.1017/S0048577200981435>
- McGowan, A.L., Chandler, M.C., Brascamp, J.W., Pontifex, M.B., 2019. Pupillometric indices of locus-coeruleus activation are not modulated following single bouts of exercise. *Int. J. Psychophysiol.* 140, 41-52. <https://doi.org/10.1016/j.ijpsycho.2019.04.004>
- McMorris, T., Barwood, M., Corbett, J., 2018. Central fatigue theory and endurance exercise: Toward an interoceptive model. *Neurosci Biobehav Rev* 93, 93-107. <https://doi.org/10.1016/j.neubiorev.2018.03.024>
- Miller, E.K., Cohen, J.D., 2001. An integrative theory of prefrontal cortex function. *Annu. Rev. Neurosci.* 24, 167-202. <https://doi.org/10.1146/annurev.neuro.24.1.167>
- Miller, M.W., Dacelar, M.F.B., Feiss, R.S., Daou, M., Alderman, B.L., In Press. P3b as an electroencephalographic index of automatic associations of exercise-related images. *Int. J. Psychophysiol.* <http://doi.org/10.1016/j.ijpsycho.2020.10.004>
- Moreau, D., Chou, E., 2019. The Acute Effect of High-Intensity Exercise on Executive Function: A Meta-Analysis. *Perspect. Psychol. Sci.* 14, 734-764. <https://doi.org/10.1177/1745691619850568>
- Morres, I.D., Hatzigeorgiadis, A., Stathi, A., Comoutos, N., Arpin-Cribbie, C., Krommidas, C., Theodorakis, Y., 2019. Aerobic exercise for adult patients with major depressive disorder in mental health services: A systematic review and meta-analysis. *Depress. Anxiety* 36, 39-53. <https://doi.org/10.1002/da.22842>
- O'Leary, K.C., Pontifex, M.B., Scudder, M.R., Brown, M.L., Hillman, C.H., 2011. The effects of single bouts of aerobic exercise, exergaming, and videogame play on cognitive control. *Clin Neurophysiol* 122, 1518-1525. <https://doi.org/10.1016/j.clinph.2011.01.049>
- Ogoh, S., Ainslie, P.N., 2009. Cerebral blood flow during exercise: mechanisms of regulation. *J Appl Physiol* (1985) 107, 1370-1380. <http://doi.org/10.1152/japplphysiol.00573.2009>
- Olson, R.L., Chang, Y.K., Brush, C.J., Kwok, A.N., Gordon, V.X., Alderman, B.L., 2016. Neurophysiological and behavioral correlates of cognitive control during low and moderate intensity exercise. *NeuroImage* 131, 171-180. <https://doi.org/10.1016/j.neuroimage.2015.10.011>
- Polich, J., 2007. Updating P300: an integrative theory of P3a and P3b. *Clin Neurophysiol* 118, 2128-2148. <https://doi.org/10.1016/j.clinph.2007.04.019>

- Pontifex, M.B., Hillman, C.H., 2007. Neuroelectric and behavioral indices of interference control during acute cycling. *Clin Neurophysiol* 118, 570-580.  
<https://doi.org/10.1016/j.clinph.2006.09.029>
- Pontifex, M.B., Parks, A.C., Henning, D.A., Kamijo, K., 2015. Single bouts of exercise selectively sustain attentional processes. *Psychophysiology* 52, 618-625.  
<https://doi.org/10.1111/psyp.12395>
- Rogers, P.J., Brunstrom, J.M., 2016. Appetite and energy balancing. *Physiol Behav* 164, 465-471. <https://doi.org/10.1016/j.physbeh.2016.03.038>
- Schubert, M.M., Desbrow, B., Sabapathy, S., Leveritt, M., 2013. Acute exercise and subsequent energy intake. A meta-analysis. *Appetite* 63, 92-104.  
<https://doi.org/10.1016/j.appet.2012.12.010>
- Scudder, M.R., Drollette, E.S., Pontifex, M.B., Hillman, C.H., 2012. Neuroelectric indices of goal maintenance following a single bout of physical activity. *Biol. Psychol.* 89, 528-531.  
<https://doi.org/10.1016/j.biopsycho.2011.12.009>
- Selya, A.S., Rose, J.S., Dierker, L.C., Hedeker, D., Mermelstein, R.J., 2012. A practical guide to calculating cohen's  $f(2)$ , a measure of local effect size, from PROC MIXED. *Front Psychol* 3, 111. <https://doi.org/10.3389/fpsyg.2012.00111>
- Sim, A.Y., Wallman, K.E., Fairchild, T.J., Guelfi, K.J., 2014. High-intensity intermittent exercise attenuates ad-libitum energy intake. *Int J Obes (Lond)* 38, 417-422.  
<https://doi.org/10.1038/ijo.2013.102>
- Smith, J.L., Carbine, K.A., Larson, M.J., Tucker, L.A., Christensen, W.F., LeCheminant, J.D., Bailey, B.W., 2020. To play or not to play? The relationship between active video game play and electrophysiological indices of food-related inhibitory control in adolescents.  
<https://doi.org/10.31234/osf.io/pby7f>
- Smith, K.J., Ainslie, P.N., 2017. Regulation of cerebral blood flow and metabolism during exercise. *Exp. Physiol.* 102, 1356-1371. <https://doi.org/10.1113/Ep086249>
- Spitoni, G.F., Ottaviani, C., Petta, A.M., Zingaretti, P., Aragona, M., Sarnicola, A., Antonucci, G., 2017. Obesity is associated with lack of inhibitory control and impaired heart rate variability reactivity and recovery in response to food stimuli. *Int. J. Psychophysiol.* 116, 77-84. <https://doi.org/10.1016/j.ijpsycho.2017.04.001>
- Stoet, G., 2010. Sex differences in the processing of flankers. *Q. J. Exp. Psychol. (Hove.)* 63, 633-638. <http://doi.org/10.1080/17470210903464253>
- Stroth, S., Kubesch, S., Dieterle, K., Ruchow, M., Heim, R., Kiefer, M., 2009. Physical fitness, but not acute exercise modulates event-related potential indices for executive control in healthy adolescents. *Brain research* 1269, 114-124.  
<https://doi.org/10.1016/j.brainres.2009.02.073>
- Swift, D.L., McGee, J.E., Earnest, C.P., Carlisle, E., Nygard, M., Johannsen, N.M., 2018. The Effects of Exercise and Physical Activity on Weight Loss and Maintenance. *Prog Cardiovasc Dis* 61, 206-213. <https://doi.org/10.1016/j.pcad.2018.07.014>
- Themanson, J.R., Hillman, C.H., 2006. Cardiorespiratory fitness and acute aerobic exercise effects on neuroelectric and behavioral measures of action monitoring. *Neuroscience* 141, 757-767. <https://doi.org/10.1016/j.neuroscience.2006.04.004>
- Tomprowski, P.D., Ellis, N.R., 1986. Effects of exercise on cognitive processes: A review. *Psychol Bull* 99, 338-346. <https://doi.org/10.1037/0033-2909.99.3.338>

- Tsai, C.L., Wang, C.H., Pan, C.Y., Chen, F.C., Huang, S.Y., Tseng, Y.T., 2016. The effects of different exercise types on visuospatial attention in the elderly. *Psychol. Sport Exerc.* 26, 130-138. <https://doi.org/10.1016/j.psychsport.2016.06.013>
- Tsai, C.L., Wang, C.H., Pan, C.Y., Chen, F.C., Huang, T.H., Chou, F.Y., 2014. Executive function and endocrinological responses to acute resistance exercise. *Front. Behav. Neurosci.* 8. <https://doi.org/10.3389/fnbeh.2014.00262>
- Van Veen, V., Carter, C.S., 2002. The timing of action-monitoring processes in the anterior cingulate cortex. *J Cogn Neurosci* 14, 593-602. <https://doi.org/10.1162/08989290260045837>
- Watson, T.D., Garvey, K.T., 2013. Neurocognitive correlates of processing food-related stimuli in a go/no-go paradigm. *Appetite* 71, 40-47. <https://doi.org/10.1016/j.appet.2013.07.007>
- Wellman, P.J., 2000. Norepinephrine and the control of food intake. *Nutrition* 16, 837-842. [https://doi.org/10.1016/s0899-9007\(00\)00415-9](https://doi.org/10.1016/s0899-9007(00)00415-9)
- Wohlwend, M., Olsen, A., Håberg, A.K., Palmer, H.S., 2017. Exercise intensity-dependent effects on cognitive control function during and after acute treadmill running in young healthy adults. *Front. Psychol.* 8, 406-406. <https://doi.org/10.3389/fpsyg.2017.00406>
- Xie, L., Ren, M., Cao, B., Li, F., 2017. Distinct brain responses to different inhibitions: Evidence from a modified Flanker Task. *Sci. Rep.* 7, 6657. <https://doi.org/10.1038/s41598-017-04907-y>
- Yanagisawa, H., Dan, I., Tsuzuki, D., Kato, M., Okamoto, M., Kyutoku, Y., Soya, H., 2010. Acute moderate exercise elicits increased dorsolateral prefrontal activation and improves cognitive performance with Stroop test. *NeuroImage* 50, 1702-1710. <https://doi.org/10.1016/j.neuroimage.2009.12.023>



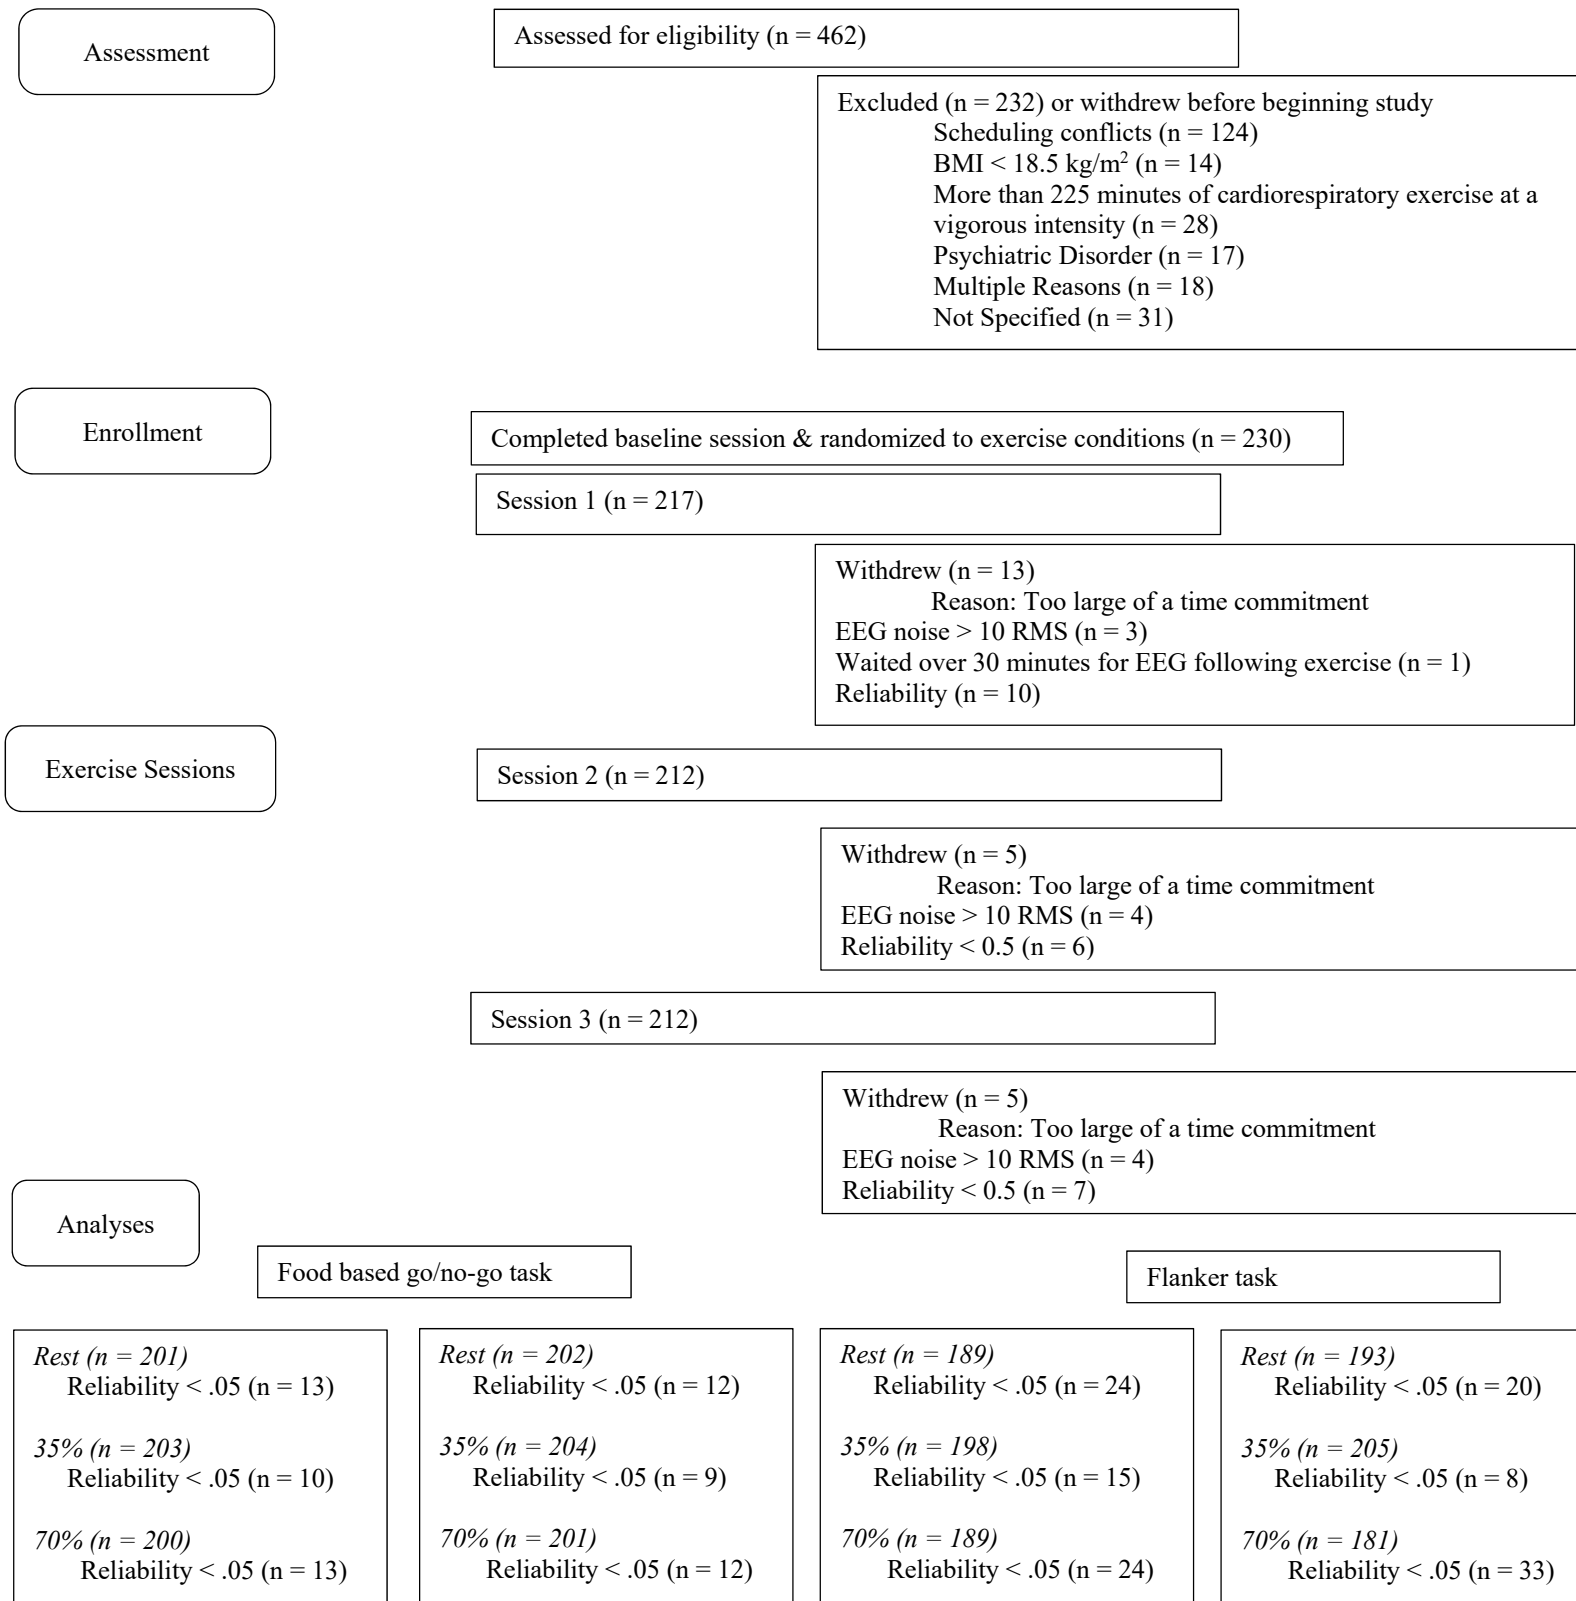

Figure 1: Overview of participant recruitment and analyses. RMS = root mean squared. As a note, numbers presented as being dropped for reliability are re-presented under analyses to show the distribution of data loss across exercise condition rather than session.

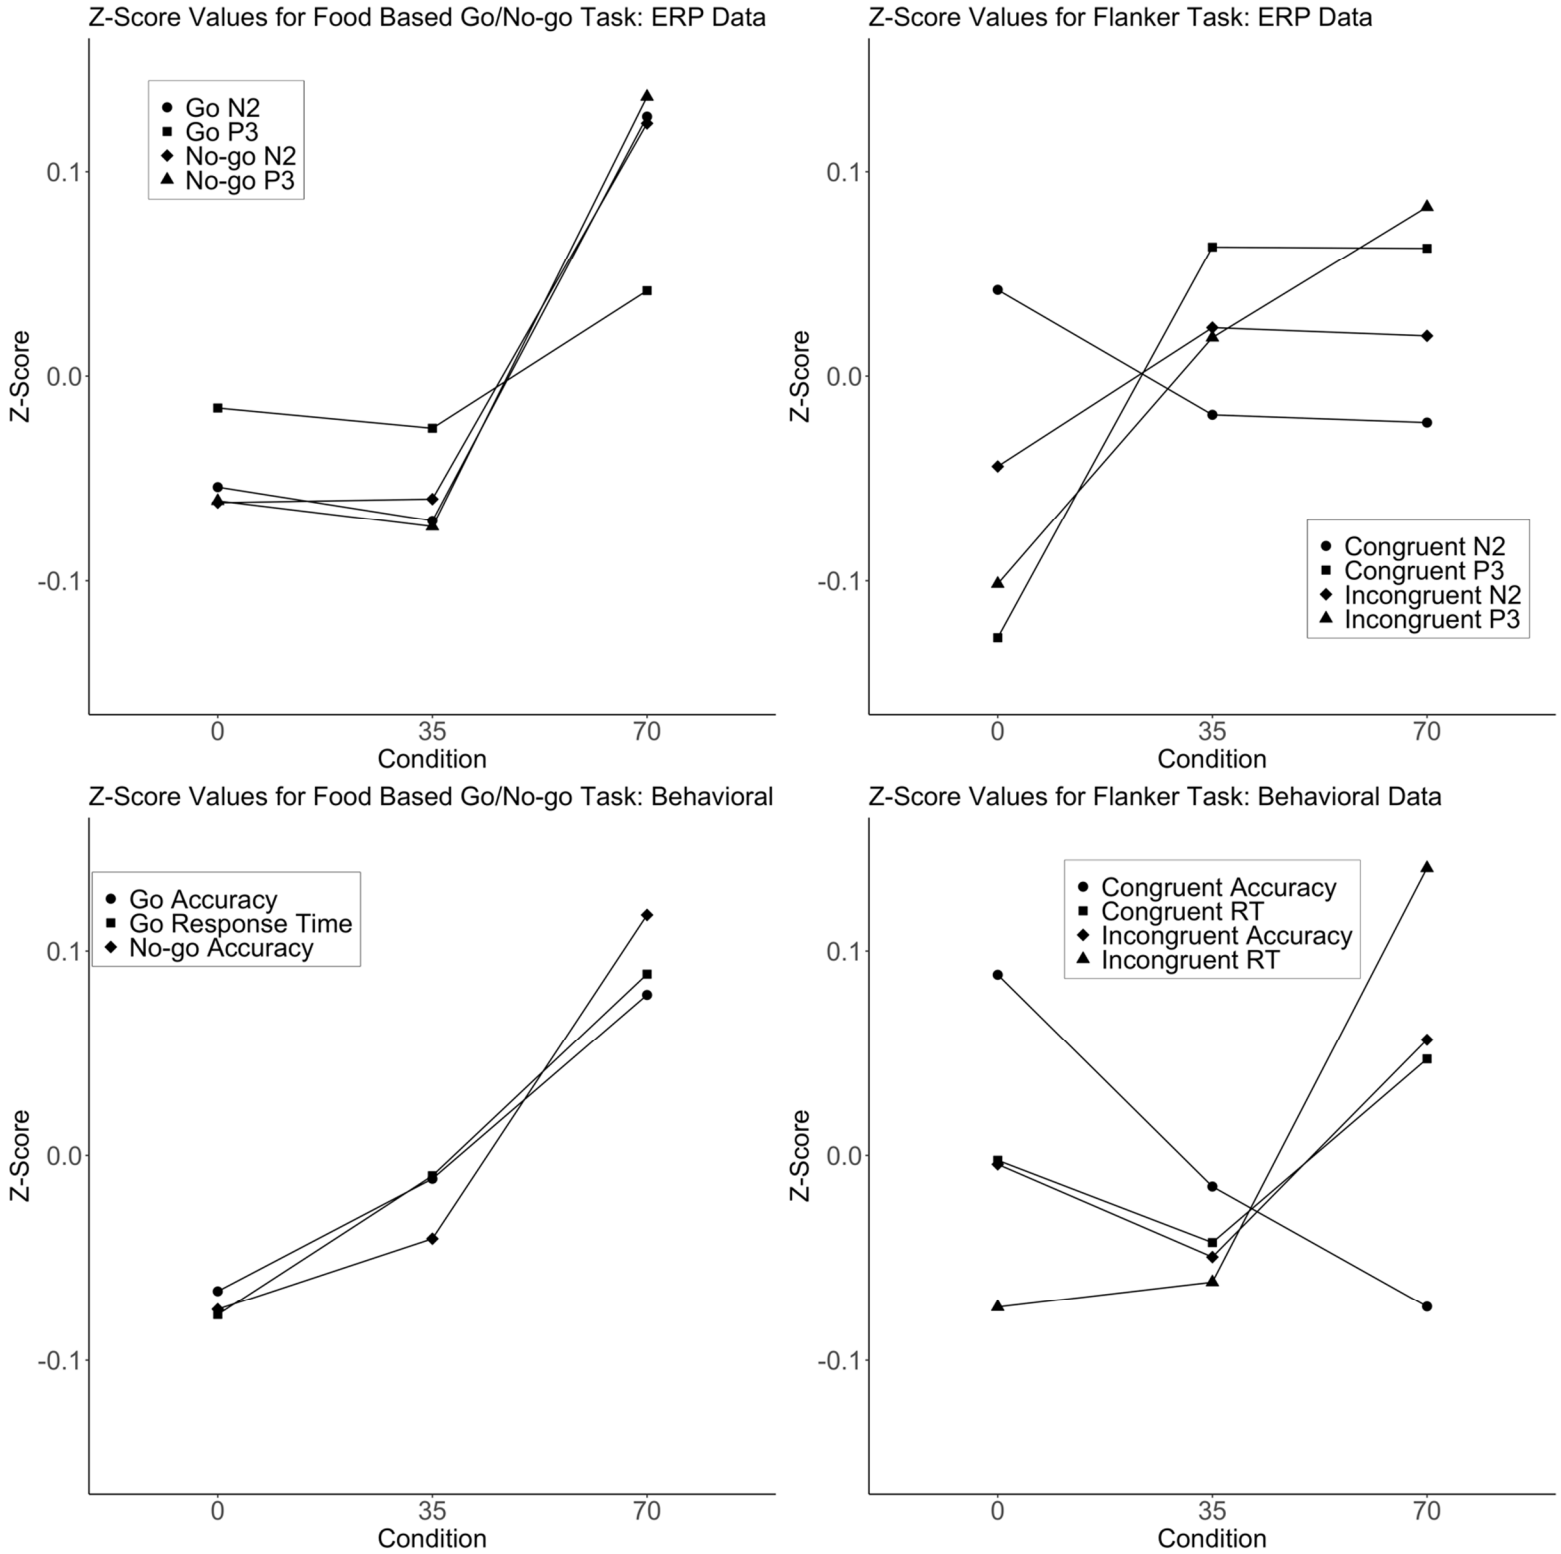

Figure 2: Z-score values of dependent variables for both tasks by exercise condition. Scores for negative-going measures (e.g., N2 amplitude, response times) were reversed so higher z-scores are associated with larger component amplitude or faster performance for ease of interpretation.

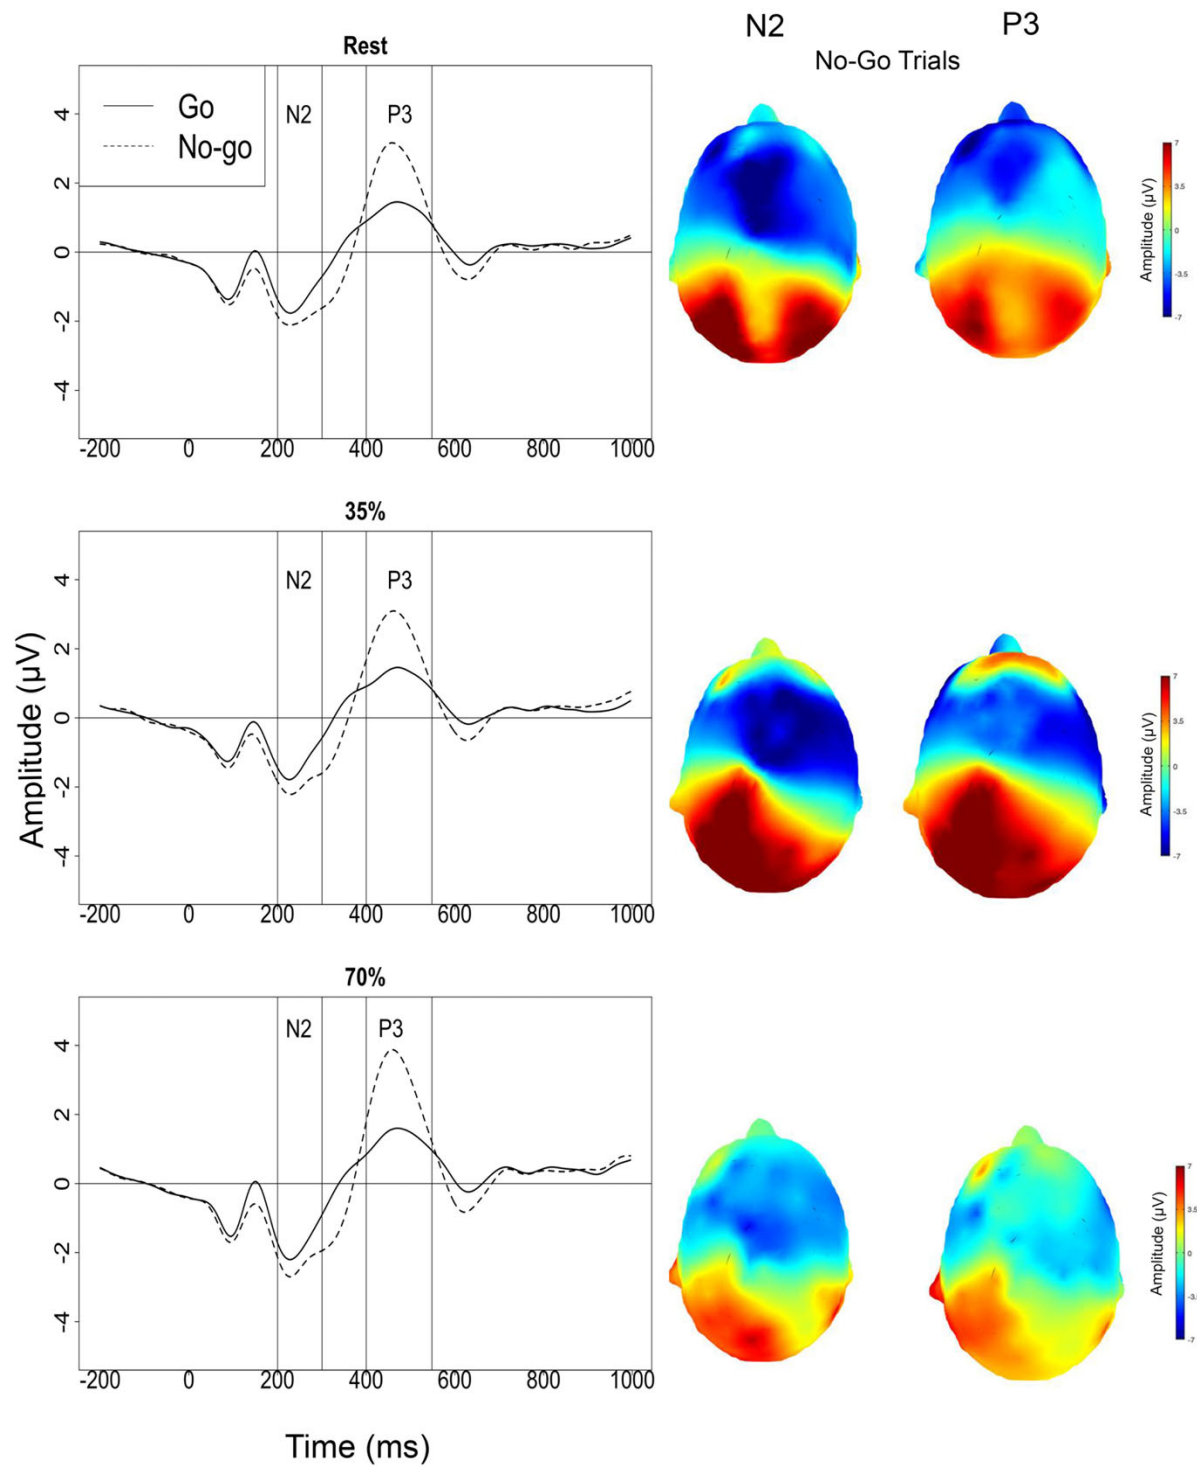

Figure 3: Event-related potential waveforms and topographical maps for the N2 and P3 on the go/no-go trials.

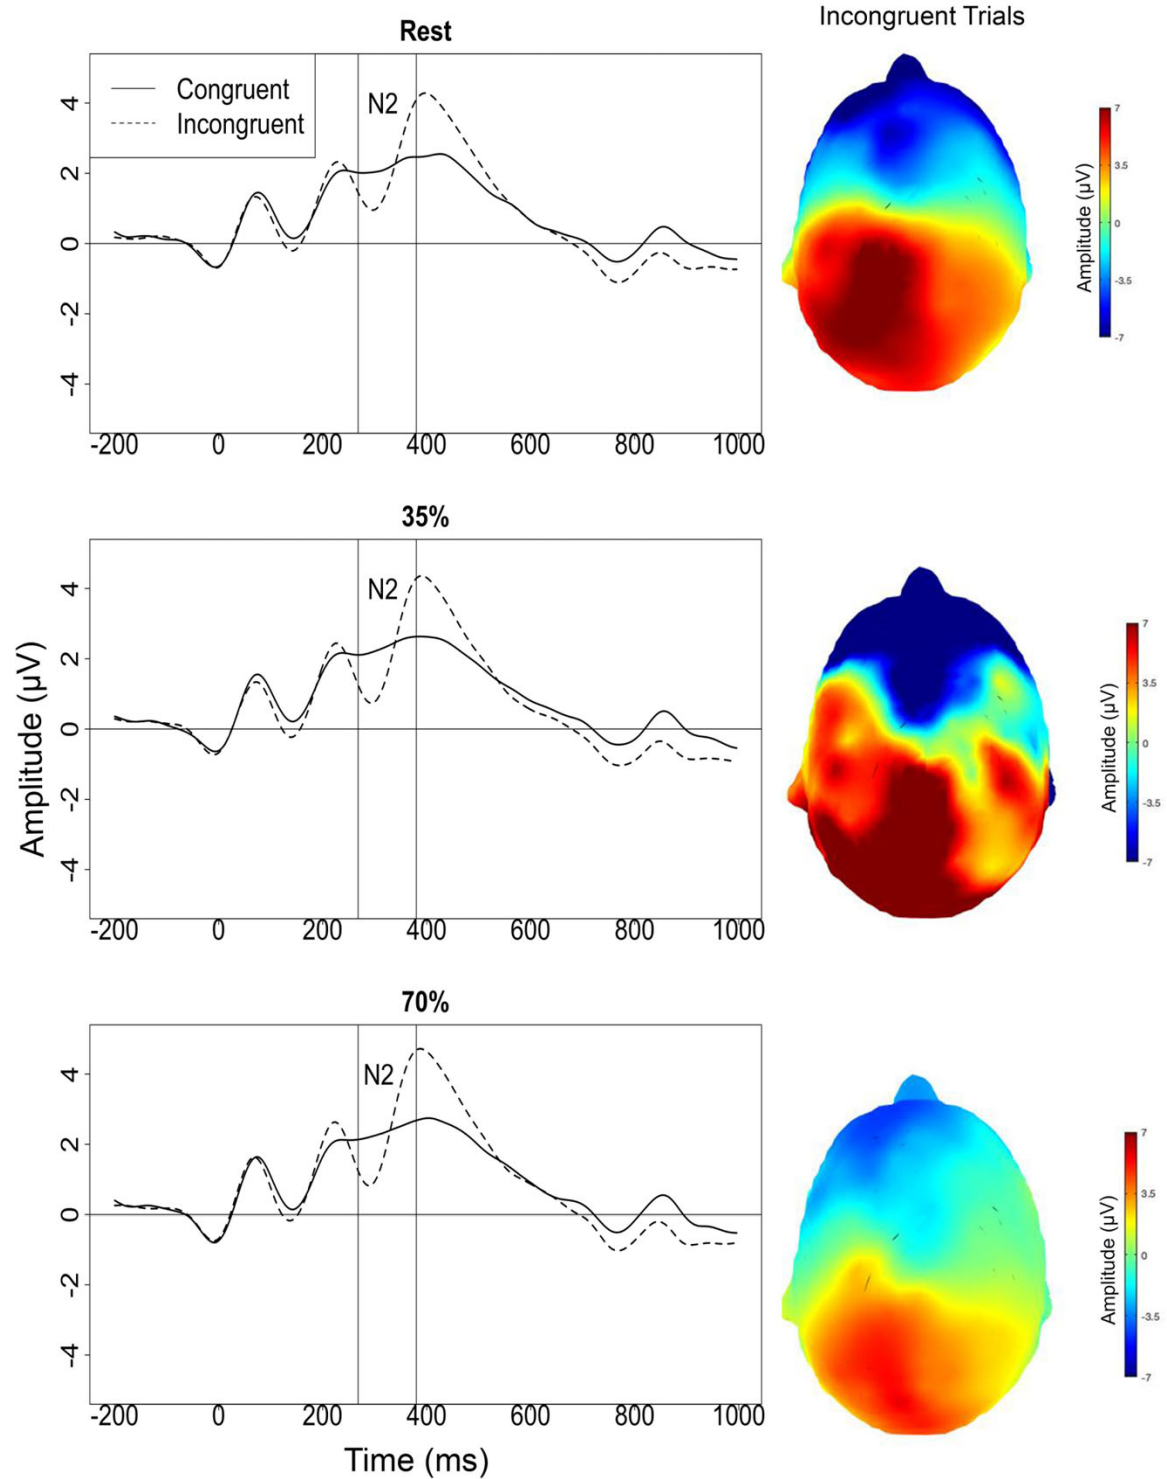

Figure 4: Event-related potential waveforms and topographical maps for the N2 on the incongruent trials during the flanker task.

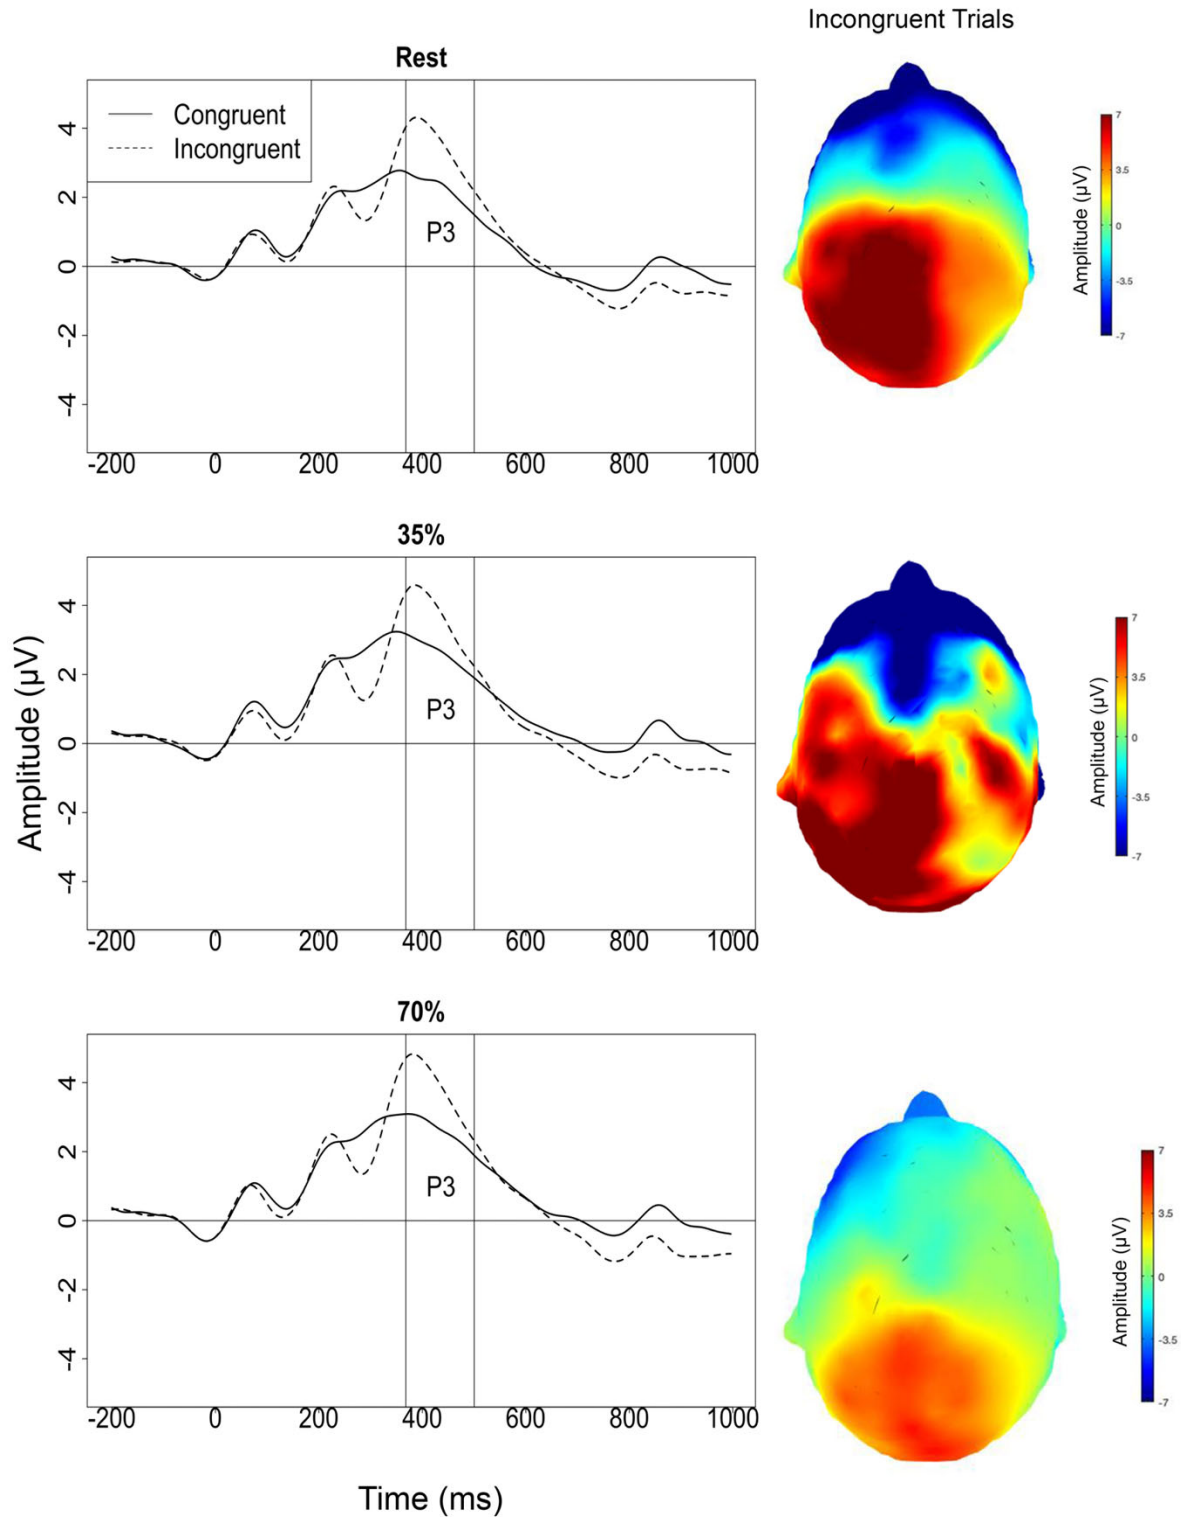

Figure 5: Event-related potential waveforms along with topographical maps for the P3 on the incongruent trials during the flanker task.
